# Supplementary material for: Roles of BrlA and AbaA in Mediating Asexual and Insect Pathogenic Lifecycles of Metarhizium robertsii
Source: MDPI journal article supplement (doi:10.3390/jof8101110), 2022-10-21
Supplement: s1 [file s1]

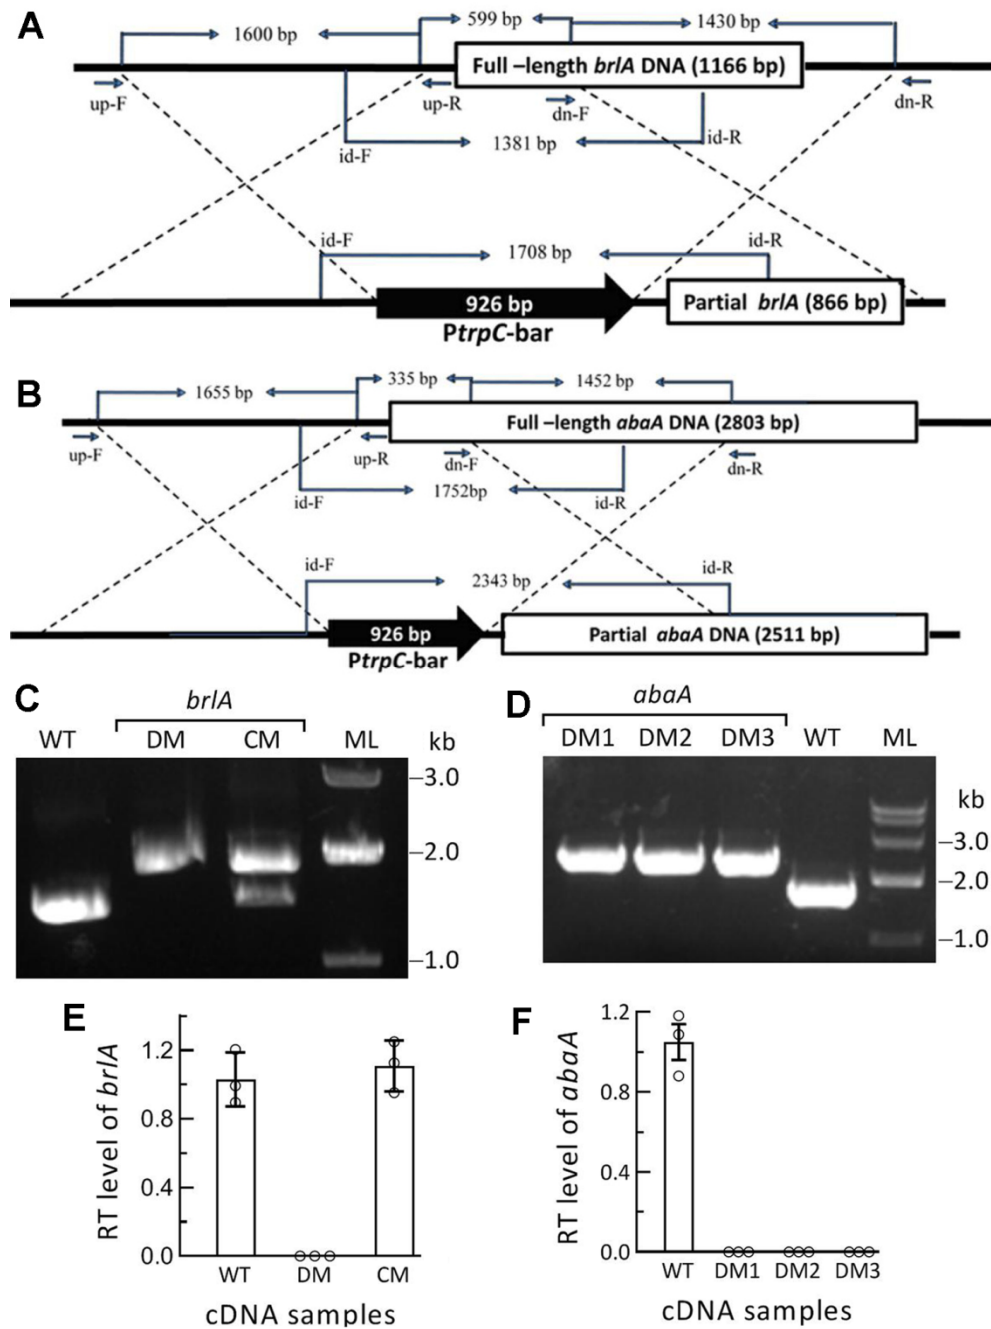

**Figure S1.** Generation and identification of *brlA* and *abaA* mutants in *M. robertsii*. (**A**, **B**) Schematic diagrams for the strategies of disruption *brlA* and *abaA* respectively. (**C**, **D**) The disruption mutants (DM) and complementation mutants (CM) of *brlA* and *abaA* identified via PCR analysis with paired primers (Table S1). The genomic DNA fragments detected by PCR include 2343 and 1753 bp from the *brlA* DM and the wild-type strain (WT) and 2343 and 1752 bp from *abaA* DM1–3 and WT respectively, leading to a partial promoter/coding fragment of *brlA* ( $1381 + 926 - 1708 = 599$  bp) or *abaA* ( $1752 + 926 - 2343 = 355$  bp) deleted from the WT DNA as illustrated in the diagram. (**E**, **F**) Relative transcript (RT) levels of *brlA* and *abaA* in the cDNA samples of their DM/CM strains with respect to the WT standard. The cDNA samples analyzed via qPCR were derived from three 4-day-old PDA cultures of each strain grown at the optimal regime. Error bars: standard deviations.

Mr A-----CTCGTTGCTGGACCCACGCCACCCCTCCAAGCCACCCCTTAACCAAGGTAGATCTCGACTCTCGACTCTTGACTCTCTCGACCCAGACTCTTGACTCTTG-----ACGCTCGACTTTGA-1071  
 An ATGCCACTTTCTCTCTGCT-----CTGCTCTCCATACAGTGACTCCCTTTTACCACATTTGGGCTTCAGTCCGAGTCTCTTGACCACCCCAAGCCATCGATCTGCCCAAGTGCCAGGGTATATATCTTTGA-890

Mr GACGAACCTTTCTCCCTCTTGGCTCTTCCCTCTTAGATC-AGCTGTCACTTTGCGGATGGTTGCGAGTTGCGAGGGATGACGAAACAAGGCATAGATATCCAAAACATCAAACCTATACCAAGCGATAGTTT-520  
 An -GCGAACGCGCCCTCTCTTCAAGCTTTGCTCTTAGACTCTGGCTGGCACTTCTCT-----CTTTGGGGAAAAAGTAATGAC-----TGCCCTCAAGTG---AGTACGACGATCTT-----CG---AGTTG-321

Mr CTGTGGAGTCTTGTCTGGCTGGCTCTTGTGATCGACTACCATCGAGATTGTTGGCTTTTCGCCCATCTCTGCGGCCATTCCTTTCCACACAGACTGCACACACCATCTGTCTCTGCGGCTCT-----390  
 An CTG-----TTTCTACCCGCTCCATTATTCCCTGCT-----GCATTGTTTA---TTTCATCCG-----CCGCTCTCTCCATTCCGGCTCCCA-ACCTTCATTCTCTC-----TCTTCACCA-220

Mr -CTCGCTCAGCACCACAAGGCTCTCTGATCG-----ACTGGGGTTGATCTGCA--CCTTGGGTTGTCTCACCTCGGTCGGTATATTCTCCACAACCT-----CATTCCACCTCAAC-293  
 An ACTCGCTCAT--TCAC---TCACTCAATCGTTCCCTTACACCCACTCTGGTCTTCTCTTTTGTCTTGTCTTCT--TCTGCACAGTCTTTACTGCTGTCTGAGATTAGCCCTCTTTCATTCTTCT-99

Mr AGTATATCTTCAGGGGGCTCCGCTCTCTTTTCTGTTGAAAAACATTCGGACCGAAGCACTCTGCTGTCTCTCAGGTCAATTTCTACCTTGTCTTTATCTACATACGGTTCTCAACATTGCTTGAAGT-163  
 An ACTG-GCCTCCACTGGCTCCACCCACCGGCTT--AGAAGCCATCCGCTCATTGCTATCCACATCTTCTGTCT-----TCTCTATCTCA-TTCAATCATCGACGAGATTCTGCAAAGCTTAGGG-21

Mr TATCGGTTAGCATTACTTAGACCTGTTCTCGAGCGTGCAAGCGGAGAATAATTTCACTCTTTTACTCTCTTTTGAACCGGCAACAACAGCAACAGCAACAATAACAACACCACCACCAATAGTAACAC-33  
 An -----AACGTAACT-GAACGGTCTCTGGCAGGTGAAC--AAGTCACAGCACCCTC-----CAAGAGCGTC-GCAGC-----GCCCGCTCGCTCGAAG--ACAT-105

Mr GCAACAAATCAGCAACGCCTACTACTATCATCATGCACTTTGAGTGGAGCTTCGGGTTGATATGGACGACAGCTTCAGCATGTGCAAGTCAAGACCTGCCCCGCCCCCTCAAGCTGCTCAAGCTTCTCAT-97  
 An GCGA-AATCAGTCCA--GCCTG-TCCGATCGCTGACCGTTGAAAGTTGATTGTTCTGCTCC-----TGG-----GCTCCAACGAG-----TGCCCGTCTATGACCTCGAGCTTCTCGC-203

Mr CAGCATCTCTGCGTACGAGCTTTTACTCTTACATC-ACGACGATCCACACCAAA-----TGAATCAAGCT-----GGAT-----TTGAGGGCGCATACAA-----TCG---TTT-191  
 An -----CGCTCGAGTCTCTACACCAACTCCAACAAGTATATATAGCCAGGGCTCCCTGGAATCACCGGTTGGCAGCGAGCAGGATCACTCCCAACAACACGTACGAACGAACCTCTCTGGTTG-321

Mr TGCTACTCACCACAGTGAGCTTACCTCACTT-TCTGGTCACTGTCCAAAGTATGTTTGGAGGTC-----TGTCAGGGAGAACAGAACATATGCTATTAAATGAGGGCTCTCCAAACACTTCCAT-314  
 An TGCTTCGATGCGCAGTGCCCTT-----TCGCTAGCAGGTATGGCGTCCACGGAGAGTCTGGGACTTCCATACGGTATGGAAGGGCAGGAACGAATGCTATGCCCAGCTTTCTCTCTGGA--TACGAT-445

Mr GAAGAAGTTGGA-----TGGG-----ATGGTCACTCGGAC-TACGACACAT-GCTCGA-GATGAACCTGGCATCAAGACACTCCATTGG-----ATCTATTACACCT--407  
 An GAGAAATATTGAACAACCTGGGATGCCCTCAGAAAGCACCAGGCTCTTATGATCATGTGCTCAAGGACTCGCTTACCATCAAGGCA-TGCATCAGTACCCAACCATGGCGCGCAACACCAACAACACTAG-547

Mr -----TCAGG-----ATCCTTTCTCTAT-----GTACACAATCTCACCAGCAGACAATGGGTCCTA-----CTTCGTTTATG-----ATGACACCTACACAC-480  
 An GGTACACGCGAGCTGCTTACCTACAGAGTCTACGACCAATCCTTGCTATCACGGTCAATATCCACCAACCGAGCGAGTCCCGAGTTCGATGTCTTCTGCTCATGTCAATGAATAACATGTTGCCAT-704

Mr AGCCTATCC-----GGATCCG-----AGATTGCCGAGTCCACATCATCATGTTCTATGTTCAAACGAGAGCCCTATCTCTTTT-----577  
 An GGATGAATCTTGGGGACTCGATTGCGCCGCAAACTATTGCGCCATCACAAGTTGGCCGAGT-TACTCCACCACCATCATATACAGACT--TTCCGACCTCTCTTAGTGATTCAAACAACATAGCCCCA-830

Mr TTCCCCAGAGGGGCTTGGCCCTCTGGAGCTTGAAGGGTTAGATATGGACAGACATC--CTCAGTCTCTCTT--GGTACCTACCACTTACATGCACACCTTCTCCG-----676  
 An CTACCCCAATCAGGTCTTGTCTCCTTGGGAC---AGGGTCAG---GGGCCGATACCCCGCTGAGCCGGCTTTCAAGGGGGCCGTGCGAATACATGGACGATTCCAGCCCTCGCCAGTCTACCCGCGAC-952

Mr -----GGCCG-ATTGCGC-GCCCATCGAAAAATGATGGTACATGAGATTCAACGAAGAGCAATGAGCTACACGTGCCCAATCCGGGCTTCACGCAAGGTATCTGGTAGCAAGTCAGATGGTG-775  
 An GGGTTTCAGAGGCGCATCGCTGGCTTCTAGGAAGAT-----GCTCCGACGACAGACCTCTAAGCAAAA-----CTTAATGCTAGAGAACCTACACAGGTCA-----TC-1048

Mr GCCTTATGATGTTGCGCGAGCCATGTGCAAAATGTGACTATCCTGGATGCCACAAGGCTTTCCGCGCAACGAACATTTAAACGTACAAAGCAGACGTGAGTATTCCGAGTTGCCAACCCACTTACAAA-905  
 An AAGCAGGTGCAAGTT-----CAAATGCAAAAGAGCTGGTTGCAACGGCCGGTTCAAGAGGCAAGAACACTTGAAGAGACACATGAAG-----AGCCACTCAAAAAG-1142

Mr ACCTCACTAACAGTCAACTAGCTTCCACGCCGAGGGACCAAAACCCTTCTCTCTGCAATTCTGTGAAAGATCAATTCACCGCTCAAGACAACCTTAATATATCATCGCAAGCTACAGCGCCGCGCCCAAC-1035  
 An A-----GAAGCCGATGTATGTTG-GGTACCAAG--GTTGTACCCGAGCCCTTCTACGGAAGTGACAACCTCAACGCC--ACTATACGAAGACCCATAGCAAAACGGGGTGGTCCG-----1253

Mr AGCAGGAATCGCGCGCTCAATTATCCCGCG-----CAGTGCCTATTATCGAAACAAGA-----GGAGCGCAGTCGCAAGCGCAGAGCGCCACCGA--AATCAAAGT-----1148  
 An -----AATCGATACGTCG-----CCACGCTGGACGAGAAGACGCCCGACTA-CGACCCAGAATTCCGCGGGGAGCTGACGCCAGACGGGGCTCCTATCTACGGGTCAAAGCTGGATGACCCCATCCG-1362

Mr -----CAGCCGATAAGCGGGTCGATGACT-----ACTGA 1161  
 An GGGCGCGGGCGATATGAGCTTGGAGGCTGGGATGAATGA 1402

**Figure S2.** Comparative DNA sequences of three transcription units found in the *brlA* orthologs of *A. nidulans* (An) and *M. robertsii* (Mr). The transcription units *brlA $\alpha$* , *brlA $\beta$*  and  $\mu$ ORF are underlined regions in blue, red and green respectively. The underlined region in purple represents the coding sequence of *brlA* in *M. robertsii*.

**Table S1.** Paired primers used for manipulation and detection of *brlA* and *abaA* in *M. robertsii*.

| Primers       | Paired sequences (5'–3')*                                                                                           | Purpose                                                     |
|---------------|---------------------------------------------------------------------------------------------------------------------|-------------------------------------------------------------|
| cBrlA-F/R     | CACAAACACCTTCAAAC <u>CCCGGG</u> ATGCAGTTTGAGTCGGACTTC / TGCTCACCATGTTAA<br><u>CGGATCC</u> GTAGTCATCGACCCGCTTAT      | Cloning <i>brlA</i> cDNA (1107 bp) for fusion to <i>gfp</i> |
| cAbaA-F/R     | CACAAACACCTTCAAAC <u>CCCGGG</u> ATGTCTTCACTCTTTCAG / TGCTCACCATGTTAAC <u>GG</u><br><u>ATCCCCATCC</u> AGCAGTGACGGGCA | Cloning <i>abaA</i> cDNA (2658 bp) for fusion to <i>gfp</i> |
| upBrlA-F/R    | TAACCCGGGGATCCGCGATGATGTATTGACGGAC / GTACCAAGCTTGGCTGCAGGTGG<br>AATGAGTTGTGGAGGA                                    | Cloning <i>brlA</i> 5'-end (1600 bp) for recombination      |
| dnBrlA-F/R    | CGTCGACCCATGGCTCGAGCCAACAACCTCCCATGAAGAA / CACTAGTCAGATCTTCTAG<br><u>A</u> GATAATGATGTATGCAGCCAAA                   | Cloning <i>brlA</i> 3'-end (1430 bp) for recombination      |
| upAbaA-F/R    | TAACCCGGGGATCCGGTGATAAGGCGGAAGAGG / TGGGAGCTCGGTACCAAGCTTA<br>TGAGACGCAACGAACGAG                                    | Cloning <i>abaA</i> 5'-end (1655 bp) for recombination      |
| dnAbaA-F/R    | CCATGGCTCGAGTCTAGACCAAGACTTCCGTCAATCCC / CGTTAACTAGTCAGATC<br><u>TAGCGTCGCCTTCATCCTC</u>                            | Cloning <i>abaA</i> 3'-end (1452 bp) for recombination      |
| flBrlA-F/R    | <u>ATCCGTCGACCTGCAGCCAAGCTTT</u> CCCTCTTGCTCTTCT / <u>ACACTAGTCAGATCTTCT</u><br><u>CTAGAGAATCCAGCCGCACTATGA</u>     | Cloning full-length <i>brlA</i> (2105 bp) for rescue        |
| pBrlA-F/R     | GAGGGATGACGAAACAAGGC / ATGGCTCGGCGAACTACA                                                                           | PCR detecting <i>brlA</i>                                   |
| pAbaA-F/R     | GGCTTGTTCTCGTTCGT / GTCGCCATCGGCATACTT                                                                              | PCR detecting <i>abaA</i>                                   |
| qBrlA-F/R     | TCAGCTGGCTCAAGCTTCTC / TCGTAGTCCGGAGTGACCAT                                                                         | qPCR detecting <i>brlA</i>                                  |
| qAbaA-F/R     | GCGTCCTTCCCTCACTTGAA / TAGCAACCTCGACAAACCCC                                                                         | qPCR detecting <i>abaA</i>                                  |
| 18S rRNA-F/R- | GAGCCAGCGAGTAATTCC / AGCCATTCAATCGGTAGTAG                                                                           | qPCR detecting 18S rRNA                                     |

\*Underlined regions denote the restriction enzyme sites introduced for the fusion of *brlA* or *abaA* cDNA (*XmaI*/*Bam*HI) to *gfp* or the deletion of *brlA* or *abaA* via homologous recombination of its *bar*-separated 5' and 3' fragments (*Bam*HI/*Pst*I and *XhoI*/*XmaI*). Underlined and italicized regions are the recognition fragments for the gateway exchange in complementary plasmid.

**Table S2.** A list of differentially expressed genes identified from the *ΔbrlA* mutant versus the WT strain of *M. roberstii*.

| gene_id  | gene_name | FPKM            |                 |                 | FPKM    |         |         | <i>ΔbrlA</i> /WT          |                 |                 | Description                                                         |
|----------|-----------|-----------------|-----------------|-----------------|---------|---------|---------|---------------------------|-----------------|-----------------|---------------------------------------------------------------------|
|          |           | <i>ΔbrlA</i> _1 | <i>ΔbrlA</i> _2 | <i>ΔbrlA</i> _3 | WT_1    | WT_2    | WT_3    | log <sub>2</sub> <i>R</i> | <i>p</i> -value | <i>q</i> -value |                                                                     |
| 19263638 | MAA_09352 | 0.0             | 0.0             | 0.0             | 14.0    | 30.8    | 28.1    | -17.89                    | 4.07E-17        | 7.00E-16        | hypothetical protein MAA_09352                                      |
| 19263635 | MAA_09349 | 0.0             | 0.0             | 0.0             | 11.7    | 8.5     | 8.3     | -16.54                    | 1.47E-15        | 2.21E-14        | hypothetical protein X797_010127                                    |
| 19262897 | MAA_08611 | 0.0             | 0.0             | 0.0             | 4.6     | 5.9     | 3.7     | -15.53                    | 1.89E-08        | 1.51E-07        | hypothetical protein X797_008967                                    |
| 19255917 | MAA_01631 | 0.0             | 0.0             | 0.0             | 1.9     | 2.7     | 1.7     | -14.38                    | 1.22E-07        | 8.60E-07        | 3-octaprenyl-4-hydroxybenzoate carboxy-lyase                        |
| 19255910 | MAA_01624 | 0.0             | 0.0             | 0.0             | 1.0     | 2.2     | 1.8     | -14.04                    | 1.95E-06        | 1.16E-05        | LysR family regulatory protein                                      |
| 19262624 | MAA_08338 | 0.0             | 0.0             | 0.0             | 1.8     | 0.0     | 1.6     | -13.45                    | 5.31E-03        | 1.55E-02        | DUF3712 domain protein                                              |
| 19255911 | MAA_01625 | 0.0             | 0.0             | 0.0             | 1.1     | 1.3     | 0.7     | -13.34                    | 3.18E-03        | 9.83E-03        | Thioesterase                                                        |
| 19264873 | MAA_10587 | 0.0             | 0.0             | 0.0             | 0.0     | 1.7     | 1.1     | -13.17                    | 3.70E-03        | 1.12E-02        | O-methyltransferase, family 2                                       |
| 23632182 | MAA_10733 | 0.0             | 0.0             | 0.0             | 0.3     | 0.1     | 0.7     | -11.88                    | 1.55E-03        | 5.20E-03        | FMN-dependent alpha-hydroxy acid dehydrogenase, active site protein |
| 19262594 | MAA_08308 | 0.1             | 0.0             | 0.0             | 17.9    | 28.0    | 19.4    | -9.84                     | 3.54E-16        | 5.62E-15        | Peptidase aspartic, active site protein                             |
| 19263637 | MAA_09351 | 137.4           | 177.8           | 3.2             | 48866.7 | 83933.1 | 58904.2 | -9.23                     | 1.41E-13        | 1.88E-12        | hypothetical protein MAA_09351                                      |
| 19262625 | MAA_08339 | 21.6            | 29.4            | 0.0             | 7189.7  | 11527.9 | 8575.0  | -9.06                     | 1.82E-07        | 1.27E-06        | hypothetical protein MAA_08339                                      |
| 19259048 | MAA_04762 | 2.3             | 3.9             | 1.4             | 622.7   | 1036.0  | 809.9   | -8.36                     | 1.07E-67        | 1.55E-65        | Multicopper oxidase, copper-binding site                            |
| 19259151 | MAA_04865 | 0.6             | 1.2             | 0.0             | 127.5   | 195.1   | 109.4   | -7.91                     | 8.54E-47        | 6.67E-45        | Peptidoglycan-binding lysin domain protein                          |
| 19262633 | MAA_08347 | 0.0             | 0.0             | 0.0             | 1.9     | 1.7     | 2.7     | -7.30                     | 2.15E-04        | 8.96E-04        | phytanoyl-CoA dioxygenase                                           |
| 19255939 | MAA_01653 | 0.0             | 0.0             | 0.3             | 6.4     | 13.4    | 23.7    | -7.10                     | 4.82E-08        | 3.60E-07        | hypothetical protein MAA_01653                                      |
| 19262656 | MAA_08370 | 0.7             | 0.0             | 0.4             | 23.6    | 41.8    | 35.7    | -6.64                     | 8.16E-35        | 4.14E-33        | polyketide synthase                                                 |
| 19258931 | MAA_04645 | 7.9             | 3.4             | 5.7             | 238.8   | 548.6   | 458.8   | -6.20                     | 1.51E-35        | 7.88E-34        | GPR1/FUN34/yaaH family protein                                      |
| 19264949 | MAA_10665 | 29.7            | 22.1            | 31.7            | 1578.2  | 1999.0  | 1677.9  | -5.98                     | 8.00E-305       | 8.00E-302       | hypothetical protein X797_001079                                    |
| 19259162 | MAA_04876 | 0.3             | 2.7             | 2.6             | 91.9    | 125.6   | 96.3    | -5.80                     | 1.59E-16        | 2.62E-15        | f420-dependent NADP reductase                                       |
| 19262577 | MAA_08291 | 9.3             | 4.4             | 17.3            | 504.1   | 546.1   | 421.4   | -5.57                     | 1.56E-25        | 4.81E-24        | sulfatase domain-containing protein                                 |
| 19258736 | MAA_04450 | 12.4            | 9.8             | 10.9            | 508.7   | 612.8   | 408.8   | -5.54                     | 7.49E-183       | 3.80E-180       | Glycoside hydrolase, superfamily                                    |
| 19263636 | MAA_09350 | 0.3             | 0.1             | 0.0             | 6.7     | 6.7     | 5.2     | -5.52                     | 1.67E-15        | 2.49E-14        | hypothetical protein MAA_09350                                      |
| 19262650 | MAA_08364 | 0.4             | 0.3             | 1.2             | 7.9     | 27.9    | 45.9    | -5.44                     | 5.87E-12        | 7.05E-11        | IDI-3 protein                                                       |
| 19255960 | MAA_01674 | 0.0             | 0.0             | 2.2             | 18.6    | 42.7    | 25.5    | -5.33                     | 2.38E-03        | 7.62E-03        | Endoribonuclease L-PSP/chorismate mutase-like protein               |
| 19264888 | MAA_10602 | 0.8             | 0.0             | 0.0             | 7.1     | 9.7     | 11.9    | -5.14                     | 3.58E-06        | 2.02E-05        | subtilisin-like protease                                            |
| 19262896 | MAA_08610 | 0.0             | 0.0             | 0.3             | 3.0     | 4.6     | 3.2     | -5.05                     | 5.49E-07        | 3.64E-06        | Protein kinase domain containing protein                            |
| 19261999 | MAA_07713 | 0.6             | 1.1             | 1.6             | 20.9    | 51.3    | 27.5    | -4.93                     | 8.89E-15        | 1.25E-13        | hypothetical protein MAA_07713                                      |
| 19262627 | MAA_08341 | 0.0             | 0.2             | 0.5             | 4.2     | 11.6    | 4.6     | -4.86                     | 2.73E-08        | 2.12E-07        | hypothetical protein MAA_08341                                      |

|          |           |       |       |       |        |        |        |       |           |           |                                                             |
|----------|-----------|-------|-------|-------|--------|--------|--------|-------|-----------|-----------|-------------------------------------------------------------|
| 19262581 | MAA_08295 | 0.0   | 0.0   | 0.2   | 1.2    | 3.5    | 0.8    | -4.75 | 3.41E-03  | 1.04E-02  | hypothetical protein MAA_08295                              |
| 19256645 | MAA_02359 | 178.5 | 171.2 | 187.6 | 4512.0 | 4602.1 | 3591.3 | -4.56 | 0.00E+00  | 0.00E+00  | Carbohydrate-binding WSC                                    |
| 19264886 | MAA_10600 | 0.2   | 0.0   | 0.3   | 5.1    | 5.4    | 1.5    | -4.50 | 8.95E-06  | 4.69E-05  | proteinrelated to zinc finger protein odd-paired-like (opl) |
| 19256469 | MAA_02183 | 98.0  | 250.3 | 596.3 | 4145.2 | 9244.2 | 6771.9 | -4.42 | 4.18E-09  | 3.66E-08  | Glucose-repressible protein Grg1                            |
| 19255929 | MAA_01643 | 1.8   | 0.8   | 2.0   | 7.4    | 26.7   | 61.0   | -4.39 | 1.03E-06  | 6.38E-06  | Cytochrome P450 CYP548V1                                    |
| 19259303 | MAA_05017 | 389.4 | 229.3 | 327.9 | 5408.9 | 7974.6 | 6431.8 | -4.39 | 1.87E-103 | 3.79E-101 | Extracellular membrane protein, CFEM domain protein         |
| 19263122 | MAA_08836 | 0.6   | 0.0   | 0.5   | 4.8    | 6.9    | 9.9    | -4.19 | 2.01E-07  | 1.38E-06  | C6 transcription factor                                     |
| 19262653 | MAA_08367 | 76.6  | 65.1  | 47.5  | 421.8  | 1297.6 | 1484.8 | -4.08 | 9.54E-13  | 1.20E-11  | ERG4/ERG24 ergosterol biosynthesis-like protein             |
| 19262575 | MAA_08289 | 1.0   | 0.2   | 0.0   | 5.1    | 4.2    | 10.6   | -4.05 | 2.89E-05  | 1.41E-04  | cell surface protein (Mas1)                                 |
| 19256722 | MAA_02436 | 56.6  | 27.8  | 35.9  | 262.7  | 622.4  | 834.6  | -3.84 | 1.08E-11  | 1.26E-10  | NAD(P)-binding domain protein                               |
| 19256063 | MAA_01777 | 0.3   | 0.0   | 0.0   | 1.0    | 1.3    | 1.7    | -3.68 | 1.13E-02  | 2.96E-02  | GPI anchored dioxygenase                                    |
| 19255928 | MAA_01642 | 0.6   | 0.9   | 0.4   | 2.5    | 7.9    | 12.7   | -3.63 | 8.83E-11  | 9.58E-10  | fatty acid synthase subunit alpha reductase                 |
| 19255925 | MAA_01639 | 1.0   | 0.9   | 0.5   | 3.5    | 8.0    | 18.4   | -3.63 | 3.29E-07  | 2.23E-06  | peptide synthetase                                          |
| 19256662 | MAA_02376 | 13.4  | 13.5  | 14.2  | 136.5  | 202.9  | 149.7  | -3.57 | 6.85E-77  | 1.16E-74  | Aromatic-ring hydroxylase-like protein                      |
| 19255931 | MAA_01645 | 13.1  | 6.8   | 5.7   | 31.5   | 77.6   | 174.2  | -3.47 | 5.60E-06  | 3.06E-05  | branched-chain-amino-acid aminotransferase TOXF             |
| 19262004 | MAA_07718 | 1.9   | 0.0   | 1.4   | 5.5    | 18.1   | 12.6   | -3.45 | 7.93E-04  | 2.90E-03  | hypothetical protein MAA_07718                              |
| 19262572 | MAA_08286 | 1.9   | 0.5   | 1.4   | 8.6    | 19.1   | 11.3   | -3.37 | 2.81E-09  | 2.53E-08  | dehydrogenase/reductase SDR family                          |
| 19262899 | MAA_08613 | 214.2 | 221.1 | 217.2 | 1995.8 | 2517.0 | 1934.8 | -3.30 | 3.68E-131 | 1.07E-128 | ntf2-like domain protein                                    |
| 19262028 | MAA_07742 | 0.6   | 0.0   | 0.2   | 2.3    | 5.5    | 0.4    | -3.30 | 1.08E-02  | 2.85E-02  | subtilisin-like protease                                    |
| 19256169 | MAA_01883 | 13.0  | 15.6  | 11.9  | 129.0  | 139.0  | 128.3  | -3.29 | 9.40E-140 | 3.18E-137 | ABC-2 type transporter                                      |
| 19258918 | MAA_04632 | 35.6  | 31.0  | 36.8  | 260.7  | 389.9  | 344.2  | -3.27 | 1.01E-73  | 1.58E-71  | hypothetical protein MAA_04632                              |
| 19259312 | MAA_05026 | 38.7  | 41.7  | 34.4  | 331.4  | 404.1  | 332.5  | -3.22 | 6.62E-102 | 1.22E-99  | galactosyltransferase superfamily protein                   |
| 19256187 | MAA_01901 | 4.8   | 6.6   | 2.6   | 40.3   | 50.7   | 37.7   | -3.20 | 7.93E-18  | 1.48E-16  | DUF967 domain protein                                       |
| 19263688 | MAA_09402 | 0.0   | 0.3   | 0.2   | 0.5    | 2.3    | 1.3    | -3.12 | 8.01E-03  | 2.22E-02  | Amino acid/polyamine transporter I                          |
| 19258932 | MAA_04646 | 19.7  | 16.0  | 100.8 | 227.5  | 576.8  | 377.3  | -3.11 | 5.04E-04  | 1.94E-03  | hypothetical protein MAA_04646                              |
| 19259184 | MAA_04898 | 0.3   | 0.6   | 0.3   | 3.2    | 3.0    | 3.9    | -3.11 | 3.73E-14  | 5.09E-13  | ABC efflux transporter                                      |
| 19258976 | MAA_04690 | 1.7   | 3.9   | 2.5   | 15.6   | 24.0   | 29.7   | -3.10 | 6.19E-16  | 9.66E-15  | DUF1479 domain protein                                      |
| 19255923 | MAA_01637 | 2.0   | 3.4   | 0.9   | 5.8    | 18.9   | 28.4   | -3.07 | 7.31E-06  | 3.89E-05  | hypothetical protein MAA_01637                              |
| 19262576 | MAA_08290 | 0.6   | 1.1   | 3.7   | 9.2    | 19.1   | 15.2   | -3.02 | 6.17E-06  | 3.34E-05  | hypothetical protein MAA_08290                              |
| 19264986 | MAA_10702 | 0.7   | 2.1   | 2.0   | 12.2   | 11.5   | 11.2   | -2.88 | 1.69E-11  | 1.94E-10  | D-xylulose reductase A                                      |
| 19264885 | MAA_10599 | 172.4 | 117.7 | 193.3 | 1348.0 | 1116.6 | 1019.5 | -2.85 | 5.15E-56  | 5.22E-54  | leucine rich repeat domain containing protein               |
| 19255924 | MAA_01638 | 1.0   | 4.3   | 1.1   | 6.1    | 12.5   | 27.5   | -2.84 | 1.52E-03  | 5.13E-03  | canalicular multispecific organic anion transporter 1       |
| 19256017 | MAA_01731 | 185.4 | 121.8 | 174.8 | 1123.5 | 1211.9 | 964.7  | -2.78 | 4.73E-61  | 5.33E-59  | multicopper oxidase                                         |

|          |           |       |       |       |        |        |        |       |           |           |                                                         |
|----------|-----------|-------|-------|-------|--------|--------|--------|-------|-----------|-----------|---------------------------------------------------------|
| 23632196 | MAA_10747 | 22.4  | 33.1  | 28.9  | 76.4   | 216.1  | 266.3  | -2.73 | 5.98E-07  | 3.91E-06  | ankyrin repeat protein                                  |
| 19264926 | MAA_10641 | 95.7  | 96.7  | 91.3  | 630.6  | 652.9  | 577.2  | -2.71 | 2.62E-123 | 6.64E-121 | carbohydrate esterase family 1 protein                  |
| 19259015 | MAA_04729 | 50.9  | 52.7  | 57.2  | 179.2  | 410.9  | 454.8  | -2.70 | 9.32E-11  | 1.01E-09  | duf500 domain containing protein                        |
| 19261958 | MAA_07672 | 0.0   | 1.9   | 2.4   | 6.9    | 8.9    | 10.9   | -2.64 | 1.21E-02  | 3.15E-02  | hypothetical protein MAA_07672                          |
| 19264993 | MAA_10709 | 7.6   | 7.9   | 5.1   | 43.2   | 45.7   | 38.1   | -2.63 | 1.21E-33  | 5.99E-32  | nicotinamide N-methyltransferase                        |
| 19256325 | MAA_02039 | 41.9  | 42.2  | 43.0  | 239.7  | 298.2  | 228.3  | -2.59 | 1.73E-61  | 2.07E-59  | Glutathione S-transferase/chloride channel              |
| 19262652 | MAA_08366 | 83.3  | 143.3 | 65.1  | 247.8  | 656.8  | 785.5  | -2.53 | 6.33E-06  | 3.42E-05  | methyltransferase                                       |
| 19262027 | MAA_07741 | 363.4 | 302.1 | 223.8 | 1583.4 | 1903.4 | 1664.4 | -2.53 | 7.40E-45  | 5.36E-43  | Formate/nitrite transporter                             |
| 23632178 | MAA_10729 | 5.7   | 5.2   | 4.4   | 25.5   | 36.7   | 20.1   | -2.43 | 2.62E-21  | 6.18E-20  | hypothetical protein MAA_10729                          |
| 19256738 | MAA_02452 | 1.8   | 2.0   | 0.6   | 6.2    | 7.7    | 8.7    | -2.37 | 3.30E-04  | 1.33E-03  | alcohol dehydrogenase                                   |
| 19262905 | MAA_08619 | 16.2  | 16.8  | 10.8  | 70.6   | 81.6   | 65.8   | -2.32 | 4.72E-27  | 1.60E-25  | choline transport protein                               |
| 19256654 | MAA_02368 | 15.6  | 20.5  | 34.6  | 57.2   | 164.2  | 126.5  | -2.30 | 2.06E-07  | 1.42E-06  | hypothetical protein MAA_02368                          |
| 19262569 | MAA_08283 | 0.2   | 0.2   | 0.2   | 0.5    | 0.7    | 1.6    | -2.28 | 3.07E-04  | 1.25E-03  | Beta-ketoacyl synthase                                  |
| 19255915 | MAA_01629 | 3.4   | 1.4   | 5.9   | 12.8   | 15.1   | 21.3   | -2.20 | 4.85E-05  | 2.25E-04  | GCN5-related N-acetyltransferase (GNAT) domain protein  |
| 19263676 | MAA_09390 | 163.2 | 139.5 | 159.6 | 709.1  | 784.2  | 611.8  | -2.19 | 2.69E-51  | 2.48E-49  | putative protein family Cys-rich                        |
| 19259267 | MAA_04981 | 7.2   | 7.5   | 4.4   | 29.1   | 31.4   | 25.2   | -2.16 | 9.05E-15  | 1.27E-13  | Extracellular membrane protein, 8-cysteine region, CFEM |
| 19259195 | MAA_04909 | 32.1  | 40.7  | 36.3  | 133.5  | 185.0  | 167.0  | -2.15 | 1.12E-35  | 6.16E-34  | major facilitator superfamily transporter               |
| 19255927 | MAA_01641 | 9.4   | 15.7  | 7.6   | 30.6   | 41.4   | 71.8   | -2.14 | 1.53E-08  | 1.26E-07  | ankyrin repeat protein                                  |
| 19263091 | MAA_08805 | 5.3   | 4.9   | 7.7   | 22.9   | 33.2   | 22.1   | -2.12 | 8.93E-07  | 5.66E-06  | IDI-2 precursor                                         |
| 19256376 | MAA_02090 | 69.2  | 55.2  | 68.1  | 236.9  | 338.9  | 261.1  | -2.12 | 1.91E-29  | 7.58E-28  | GCN5-related N-acetyltransferase (GNAT) domain protein  |
| 19256313 | MAA_02027 | 5.6   | 5.4   | 4.2   | 15.0   | 26.4   | 22.2   | -2.07 | 3.84E-09  | 3.40E-08  | hypothetical protein MAA_02027                          |
| 19259175 | MAA_04889 | 67.2  | 41.9  | 58.8  | 204.1  | 284.2  | 215.1  | -2.07 | 3.00E-23  | 8.23E-22  | salicylate hydroxylase                                  |
| 19258785 | MAA_04499 | 87.8  | 74.5  | 103.4 | 299.6  | 441.2  | 362.5  | -2.05 | 1.60E-30  | 7.05E-29  | pyruvate decarboxylase                                  |
| 19256326 | MAA_02040 | 149.9 | 196.0 | 189.6 | 584.6  | 723.2  | 902.8  | -2.05 | 7.51E-31  | 3.39E-29  | hypothetical protein MAA_02040                          |
| 19256699 | MAA_02413 | 154.4 | 105.8 | 101.0 | 551.1  | 424.9  | 499.3  | -2.03 | 3.08E-29  | 1.16E-27  | C4-dicarboxylate transporter/malic acid transporter     |
| 19256739 | MAA_02453 | 25.1  | 21.0  | 21.2  | 76.6   | 114.5  | 83.3   | -2.03 | 1.36E-26  | 4.38E-25  | arrestin domain-containing protein                      |
| 19262613 | MAA_08327 | 100.2 | 109.6 | 74.7  | 329.4  | 464.6  | 352.9  | -2.01 | 7.60E-25  | 2.20E-23  | hypothetical protein MAA_08327                          |
| 19262628 | MAA_08342 | 2.7   | 1.1   | 0.6   | 4.4    | 7.9    | 5.1    | -1.98 | 9.83E-04  | 3.54E-03  | Heterokaryon incompatibility                            |
| 19259129 | MAA_04843 | 22.2  | 9.4   | 29.6  | 74.9   | 94.0   | 71.8   | -1.97 | 4.38E-09  | 3.80E-08  | Basic-leucine zipper (bZIP) transcription factor        |
| 19259294 | MAA_05008 | 4.8   | 3.9   | 4.4   | 16.3   | 18.1   | 16.7   | -1.97 | 1.96E-13  | 2.55E-12  | taurine catabolism dioxygenase TauD                     |
| 19258936 | MAA_04650 | 27.2  | 23.9  | 37.3  | 133.9  | 114.6  | 95.8   | -1.96 | 1.64E-18  | 3.19E-17  | hypothetical protein MAA_04650                          |
| 19258750 | MAA_04464 | 32.1  | 32.7  | 35.0  | 97.7   | 148.5  | 139.9  | -1.95 | 4.06E-26  | 1.27E-24  | Ytp1 and DUF2427 domain protein                         |
| 19256403 | MAA_02117 | 122.6 | 124.4 | 149.5 | 531.4  | 454.0  | 459.4  | -1.87 | 8.45E-59  | 9.03E-57  | Short-chain dehydrogenase/reductase SDR                 |



|          |           |       |       |       |       |       |       |       |          |          |                                                                  |
|----------|-----------|-------|-------|-------|-------|-------|-------|-------|----------|----------|------------------------------------------------------------------|
| 19262856 | MAA_08570 | 86.1  | 66.7  | 87.8  | 225.4 | 374.2 | 270.5 | -1.85 | 2.00E-16 | 3.25E-15 | glyoxalase family protein                                        |
| 19262578 | MAA_08292 | 33.8  | 37.1  | 29.5  | 113.8 | 134.5 | 113.1 | -1.85 | 2.80E-29 | 1.07E-27 | Nitrilase/cyanide hydratase and apolipoprotein N-acyltransferase |
| 19259203 | MAA_04917 | 28.3  | 19.4  | 28.7  | 85.2  | 101.1 | 71.2  | -1.75 | 8.44E-10 | 8.16E-09 | Stress responsive alpha-beta barrel                              |
| 19258996 | MAA_04710 | 91.3  | 60.5  | 86.7  | 171.3 | 319.4 | 312.5 | -1.75 | 3.76E-11 | 4.23E-10 | Glutathione S-transferase/chloride channel                       |
| 19262014 | MAA_07728 | 71.3  | 84.9  | 60.6  | 227.0 | 266.7 | 236.2 | -1.75 | 1.99E-28 | 7.20E-27 | transmembrane amino acid transporter                             |
| 19262022 | MAA_07736 | 28.2  | 22.2  | 22.7  | 84.7  | 62.5  | 97.1  | -1.74 | 2.68E-23 | 7.44E-22 | Carbohydrate-binding WSC                                         |
| 19263127 | MAA_08841 | 5.0   | 2.5   | 2.5   | 11.9  | 12.2  | 9.1   | -1.74 | 4.13E-06 | 2.30E-05 | NAD(P)-binding domain protein                                    |
| 19261930 | MAA_07644 | 146.7 | 154.2 | 144.0 | 423.1 | 540.6 | 513.6 | -1.73 | 8.17E-38 | 5.53E-36 | hypothetical protein MAA_07644                                   |
| 19259152 | MAA_04866 | 48.8  | 31.8  | 39.7  | 120.5 | 148.7 | 129.0 | -1.73 | 8.38E-18 | 1.55E-16 | SAM-dependent methyltransferase                                  |
| 19256253 | MAA_01967 | 11.4  | 15.4  | 8.4   | 41.2  | 34.7  | 37.9  | -1.69 | 2.08E-10 | 2.15E-09 | hypothetical protein MAA_01967                                   |
| 19256318 | MAA_02032 | 16.0  | 15.3  | 16.7  | 47.6  | 63.1  | 43.9  | -1.69 | 7.64E-17 | 1.28E-15 | 3-phytase                                                        |
| 19258823 | MAA_04537 | 19.7  | 16.9  | 26.3  | 65.8  | 74.1  | 61.5  | -1.68 | 5.59E-18 | 1.07E-16 | Major facilitator superfamily domain protein                     |
| 19258830 | MAA_04544 | 42.3  | 28.4  | 32.1  | 51.0  | 111.2 | 165.7 | -1.67 | 2.52E-05 | 1.24E-04 | hypothetical protein MAA_04544                                   |
| 19258800 | MAA_04514 | 65.4  | 86.4  | 58.2  | 211.4 | 227.1 | 231.3 | -1.67 | 1.97E-25 | 5.97E-24 | metallopeptidase                                                 |
| 19264922 | MAA_10637 | 74.9  | 74.5  | 72.7  | 183.0 | 273.3 | 251.2 | -1.67 | 1.73E-22 | 4.44E-21 | hypothetical protein MAA_10637                                   |
| 19262657 | MAA_08371 | 56.8  | 39.7  | 47.8  | 90.1  | 167.4 | 191.1 | -1.64 | 1.83E-09 | 1.70E-08 | oxidoreductase                                                   |
| 19262907 | MAA_08621 | 2.2   | 1.9   | 1.3   | 6.1   | 3.9   | 6.9   | -1.62 | 2.62E-03 | 8.23E-03 | f420-dependent NADP reductase                                    |
| 19256766 | MAA_02480 | 30.6  | 40.2  | 35.4  | 104.8 | 120.2 | 96.9  | -1.60 | 1.66E-26 | 5.28E-25 | NAD-specific glutamate dehydrogenase                             |
| 23632203 | MAA_10754 | 7.4   | 5.2   | 5.4   | 19.6  | 13.0  | 21.5  | -1.59 | 1.01E-06 | 6.31E-06 | gag-pol polypeptide                                              |
| 19259036 | MAA_04750 | 18.5  | 14.6  | 15.3  | 36.6  | 55.4  | 52.9  | -1.58 | 7.00E-09 | 5.99E-08 |                                                                  |
| 19263677 | MAA_09391 | 14.5  | 13.4  | 13.0  | 36.3  | 45.2  | 39.2  | -1.56 | 2.35E-27 | 8.35E-26 | hypothetical protein MAA_09391                                   |
| 19259268 | MAA_04982 | 18.5  | 9.4   | 7.6   | 32.8  | 35.1  | 36.9  | -1.56 | 1.82E-06 | 1.10E-05 | protein-arginine deiminase type-4                                |
| 19264893 | MAA_10607 | 3.3   | 3.6   | 5.8   | 10.4  | 13.2  | 13.7  | -1.56 | 6.84E-06 | 3.66E-05 | hypothetical protein MAA_10607                                   |
| 19258999 | MAA_04713 | 26.6  | 28.2  | 37.8  | 60.1  | 116.4 | 95.0  | -1.55 | 3.18E-07 | 2.16E-06 | hypothetical protein MAA_04713                                   |
| 19259273 | MAA_04987 | 20.3  | 15.9  | 13.9  | 43.7  | 62.1  | 40.9  | -1.55 | 2.03E-06 | 1.21E-05 | Kazal domain-containing protein                                  |
| 19259271 | MAA_04985 | 39.8  | 39.0  | 32.6  | 73.3  | 140.3 | 112.3 | -1.55 | 1.55E-08 | 1.28E-07 | NADPH-dependent FMN reductase                                    |
| 19261986 | MAA_07700 | 1.8   | 1.2   | 2.2   | 4.4   | 3.8   | 7.2   | -1.54 | 1.67E-03 | 5.54E-03 | FAD-binding protein                                              |
| 19259159 | MAA_04873 | 3.0   | 5.4   | 4.3   | 12.5  | 13.3  | 11.0  | -1.54 | 1.88E-06 | 1.13E-05 | acetolactate synthase                                            |
| 19264975 | MAA_10691 | 7.2   | 3.4   | 6.8   | 15.0  | 18.6  | 16.8  | -1.53 | 1.38E-05 | 7.03E-05 | S-adenosyl-L-methionine-dependent methyltransferase              |
| 19262909 | MAA_08623 | 43.1  | 46.6  | 48.6  | 165.8 | 106.4 | 127.7 | -1.53 | 4.00E-17 | 6.93E-16 | phytanoyl-CoA dioxygenase                                        |
| 19259160 | MAA_04874 | 58.5  | 39.2  | 51.3  | 157.5 | 138.2 | 130.9 | -1.52 | 9.59E-19 | 1.91E-17 | glycosyltransferase family 31                                    |
| 19262021 | MAA_07735 | 18.8  | 19.0  | 19.0  | 53.4  | 47.4  | 58.6  | -1.49 | 6.64E-24 | 1.87E-22 | Extracellular membrane protein, CFEM domain protein              |
| 19256319 | MAA_02033 | 5.8   | 5.7   | 14.1  | 27.1  | 28.5  | 16.0  | -1.49 | 7.80E-03 | 2.16E-02 | hypothetical protein MAA_02033                                   |

|          |           |       |       |       |       |       |       |       |          |          |                                                    |
|----------|-----------|-------|-------|-------|-------|-------|-------|-------|----------|----------|----------------------------------------------------|
| 19262026 | MAA_07740 | 12.0  | 5.5   | 13.1  | 23.9  | 36.5  | 24.8  | -1.48 | 5.25E-05 | 2.43E-04 | muconate cycloisomerase I, MLE                     |
| 19256283 | MAA_01997 | 24.1  | 27.6  | 21.8  | 64.9  | 74.5  | 62.6  | -1.46 | 5.22E-17 | 8.83E-16 | Carboxylesterase type B, active site protein       |
| 19259247 | MAA_04961 | 13.8  | 10.1  | 21.5  | 43.8  | 46.0  | 34.6  | -1.45 | 7.13E-07 | 4.56E-06 | vacuolar triacylglycerol lipase                    |
| 19256663 | MAA_02377 | 16.9  | 36.5  | 20.3  | 61.8  | 53.3  | 85.8  | -1.45 | 7.29E-04 | 2.70E-03 | ATP-binding cassette transporter iFT1              |
| 19256755 | MAA_02469 | 123.3 | 118.7 | 138.9 | 335.6 | 376.0 | 323.3 | -1.44 | 9.78E-37 | 6.02E-35 | acetoacetyl-CoA synthase                           |
| 19264976 | MAA_10692 | 11.0  | 3.7   | 4.1   | 17.0  | 17.3  | 15.9  | -1.42 | 9.64E-03 | 2.59E-02 | ubiquitin-conjugating enzyme                       |
| 19259171 | MAA_04885 | 74.5  | 81.0  | 55.0  | 142.8 | 221.8 | 196.5 | -1.41 | 3.68E-10 | 3.70E-09 | Short-chain dehydrogenase/reductase SDR            |
| 19256224 | MAA_01938 | 21.3  | 12.1  | 13.1  | 37.5  | 46.9  | 39.4  | -1.41 | 7.30E-07 | 4.65E-06 | thioesterase family protein                        |
| 19263633 | MAA_09347 | 7.3   | 4.6   | 8.4   | 15.8  | 22.7  | 15.2  | -1.40 | 1.55E-04 | 6.71E-04 | transmembrane amino acid transporter               |
| 19261985 | MAA_07699 | 8.6   | 9.0   | 8.4   | 16.5  | 23.2  | 29.2  | -1.40 | 1.28E-07 | 9.05E-07 | flavin-binding monooxygenase                       |
| 19256457 | MAA_02171 | 142.2 | 188.6 | 147.3 | 397.9 | 435.6 | 397.8 | -1.37 | 1.96E-22 | 4.97E-21 | Calcium/proton exchanger                           |
| 19262850 | MAA_08564 | 41.6  | 41.2  | 43.1  | 113.0 | 106.8 | 101.9 | -1.35 | 7.22E-48 | 6.11E-46 | IQ calmodulin-binding motif domain protein         |
| 19264954 | MAA_10670 | 34.7  | 38.2  | 37.0  | 53.2  | 96.5  | 130.2 | -1.35 | 4.43E-05 | 2.08E-04 | hypothetical protein MAA_10670                     |
| 19262626 | MAA_08340 | 24.2  | 25.1  | 22.4  | 52.9  | 70.7  | 57.6  | -1.34 | 5.31E-15 | 7.75E-14 | hypothetical protein MAA_08340                     |
| 19264965 | MAA_10681 | 6.5   | 7.0   | 2.5   | 8.7   | 17.8  | 14.1  | -1.34 | 6.28E-03 | 1.79E-02 | hypothetical protein MAA_10681                     |
| 19264966 | MAA_10682 | 14.6  | 18.4  | 18.8  | 35.5  | 42.6  | 52.7  | -1.34 | 1.34E-11 | 1.54E-10 | WD40 domain protein                                |
| 23632179 | MAA_10730 | 44.3  | 37.5  | 40.7  | 82.4  | 129.8 | 93.5  | -1.32 | 1.05E-08 | 8.81E-08 | Bromodomain protein                                |
| 19256239 | MAA_01953 | 3.2   | 6.7   | 2.5   | 9.7   | 10.0  | 11.2  | -1.32 | 3.41E-03 | 1.04E-02 | dipeptidyl aminopeptidase/acylaminoacyl peptidase  |
| 19258977 | MAA_04691 | 172.3 | 115.6 | 163.1 | 227.8 | 446.9 | 447.3 | -1.31 | 1.73E-06 | 1.05E-05 | hypothetical protein H634G_00721                   |
| 19256669 | MAA_02383 | 91.8  | 93.6  | 86.2  | 204.3 | 228.4 | 241.1 | -1.31 | 6.04E-30 | 2.61E-28 | homogentisate 1,2-dioxygenase                      |
| 19263682 | MAA_09396 | 326.5 | 329.9 | 375.0 | 763.4 | 971.8 | 804.9 | -1.30 | 8.91E-23 | 2.38E-21 | Alcohol dehydrogenase superfamily, zinc-type       |
| 19258909 | MAA_04623 | 38.4  | 48.8  | 34.9  | 82.5  | 105.5 | 112.5 | -1.30 | 1.74E-11 | 1.98E-10 | glutamate decarboxylase                            |
| 19256221 | MAA_01935 | 28.3  | 18.8  | 23.5  | 44.4  | 58.0  | 70.6  | -1.29 | 1.63E-08 | 1.33E-07 | integral membrane protein                          |
| 19256496 | MAA_02210 | 170.1 | 139.5 | 141.7 | 337.4 | 400.9 | 360.6 | -1.28 | 1.31E-20 | 2.96E-19 | glucosamine-6-phosphate deaminase                  |
| 19259074 | MAA_04788 | 63.7  | 49.3  | 71.0  | 113.4 | 178.6 | 154.2 | -1.28 | 2.99E-08 | 2.31E-07 | dopa 4,5-dioxygenase                               |
| 19263092 | MAA_08806 | 10.9  | 11.9  | 16.5  | 34.4  | 39.2  | 21.4  | -1.27 | 4.05E-05 | 1.93E-04 | Aminoglycoside phosphotransferase                  |
| 19263651 | MAA_09365 | 152.2 | 130.0 | 129.8 | 236.2 | 424.8 | 331.9 | -1.27 | 3.88E-09 | 3.42E-08 | NAD dependent epimerase/dehydratase family protein |
| 19264994 | MAA_10710 | 6.3   | 7.7   | 4.1   | 10.8  | 18.6  | 14.3  | -1.27 | 1.93E-03 | 6.36E-03 | hypothetical protein MAA_10710                     |
| 19263667 | MAA_09381 | 34.0  | 34.2  | 10.2  | 43.7  | 76.0  | 69.0  | -1.27 | 5.08E-03 | 1.50E-02 | protoporphyrinogen oxidase                         |
| 19259052 | MAA_04766 | 218.4 | 199.2 | 162.9 | 477.6 | 472.4 | 446.3 | -1.27 | 2.37E-20 | 5.22E-19 | 4-hydroxyphenylpyruvate dioxygenase                |
| 19264931 | MAA_10646 | 50.1  | 42.6  | 45.3  | 112.3 | 100.0 | 119.5 | -1.27 | 1.54E-21 | 3.68E-20 | hypothetical protein MAA_10646                     |
| 19263093 | MAA_08807 | 9.1   | 5.9   | 12.1  | 27.5  | 21.5  | 16.0  | -1.26 | 2.03E-04 | 8.52E-04 | Alkaline phosphatase, active site protein          |
| 23632200 | MAA_10751 | 23.2  | 18.3  | 27.6  | 71.8  | 46.9  | 46.1  | -1.25 | 1.13E-05 | 5.85E-05 |                                                    |



|          |           |       |       |       |       |        |        |       |          |          |                                                       |
|----------|-----------|-------|-------|-------|-------|--------|--------|-------|----------|----------|-------------------------------------------------------|
| 19255941 | MAA_01655 | 31.3  | 31.3  | 15.6  | 33.6  | 74.6   | 76.9   | -1.24 | 7.76E-04 | 2.85E-03 | hypothetical protein MAA_01655                        |
| 19262655 | MAA_08369 | 608.2 | 573.6 | 706.5 | 637.9 | 1816.1 | 1993.5 | -1.24 | 1.68E-02 | 4.18E-02 | Dimeric alpha-beta barrel                             |
| 19261929 | MAA_07643 | 19.0  | 16.4  | 22.0  | 46.8  | 45.7   | 42.2   | -1.23 | 2.85E-12 | 3.46E-11 | alternative sulfate transporter                       |
| 19261964 | MAA_07678 | 15.1  | 9.8   | 15.0  | 27.7  | 28.7   | 36.5   | -1.22 | 6.44E-04 | 2.41E-03 | hypothetical protein X797_007007                      |
| 19259063 | MAA_04777 | 1.5   | 1.9   | 3.5   | 4.1   | 5.9    | 5.9    | -1.21 | 1.10E-02 | 2.87E-02 | glucans biosynthesis glucosyltransferase H            |
| 19261992 | MAA_07706 | 4.4   | 3.8   | 3.5   | 8.0   | 9.9    | 9.1    | -1.20 | 3.73E-05 | 1.79E-04 | major facilitator superfamily transporter             |
| 19259083 | MAA_04797 | 34.9  | 43.7  | 36.8  | 68.5  | 97.2   | 100.0  | -1.20 | 1.69E-08 | 1.36E-07 | Epoxide hydrolase-like protein                        |
| 19256065 | MAA_01779 | 171.9 | 212.7 | 186.0 | 408.0 | 465.8  | 439.0  | -1.20 | 6.81E-20 | 1.47E-18 | EF-Hand 1, calcium-binding site                       |
| 19262001 | MAA_07715 | 97.4  | 105.6 | 91.6  | 196.0 | 255.6  | 225.2  | -1.20 | 3.74E-14 | 5.09E-13 | dienelactone hydrolase                                |
| 19255988 | MAA_01702 | 145.2 | 102.2 | 183.0 | 353.9 | 317.2  | 312.7  | -1.19 | 6.55E-10 | 6.42E-09 | Chloramphenicol acetyltransferase-like domain protein |
| 19264981 | MAA_10697 | 30.2  | 21.8  | 23.7  | 53.0  | 62.7   | 56.7   | -1.19 | 1.52E-07 | 1.07E-06 | HhH-GPD domain-containing protein                     |
| 19256252 | MAA_01966 | 12.5  | 17.8  | 12.4  | 31.5  | 32.5   | 32.7   | -1.18 | 1.84E-08 | 1.48E-07 | Amino acid/polyamine transporter I                    |
| 19256264 | MAA_01978 | 15.5  | 24.7  | 16.1  | 42.8  | 44.2   | 40.3   | -1.18 | 5.52E-07 | 3.65E-06 | hypothetical protein MAA_01978                        |
| 19262019 | MAA_07733 | 44.4  | 39.7  | 30.8  | 91.9  | 85.0   | 82.0   | -1.17 | 3.13E-10 | 3.16E-09 | lipase/thioesterase                                   |
| 19263121 | MAA_08835 | 34.9  | 31.0  | 25.5  | 58.1  | 72.3   | 74.9   | -1.17 | 1.86E-08 | 1.49E-07 | von Willebrand factor, type A                         |
| 19263663 | MAA_09377 | 20.5  | 14.1  | 16.6  | 32.4  | 40.1   | 42.0   | -1.16 | 1.57E-07 | 1.10E-06 | SPFH domain/Band 7 family protein                     |
| 19255901 | MAA_01615 | 26.9  | 16.6  | 19.3  | 32.6  | 47.0   | 58.6   | -1.14 | 4.22E-05 | 2.00E-04 | glucose oxidase                                       |
| 19256650 | MAA_02364 | 22.0  | 33.2  | 20.7  | 54.4  | 46.1   | 65.4   | -1.13 | 1.40E-07 | 9.84E-07 | ABC-2 type transporter                                |
| 19264930 | MAA_10645 | 38.1  | 38.5  | 44.8  | 58.2  | 100.0  | 106.6  | -1.12 | 1.18E-05 | 6.06E-05 | hypothetical protein MAA_10645                        |
| 19256108 | MAA_01822 | 122.2 | 114.4 | 110.0 | 238.0 | 283.1  | 234.3  | -1.12 | 4.46E-18 | 8.62E-17 | ribitol kinase                                        |
| 19258849 | MAA_04563 | 87.2  | 87.0  | 76.3  | 144.7 | 214.1  | 184.6  | -1.12 | 7.14E-11 | 7.78E-10 | phosphoketolase, Mpk1                                 |
| 19258944 | MAA_04658 | 384.3 | 375.4 | 459.0 | 861.2 | 949.3  | 816.5  | -1.11 | 1.03E-20 | 2.35E-19 | Cytochrome P450 CYP548A10                             |
| 19256173 | MAA_01887 | 117.9 | 132.6 | 126.3 | 262.4 | 279.7  | 269.6  | -1.11 | 1.49E-29 | 6.06E-28 | betaine aldehyde dehydrogenase                        |
| 19256064 | MAA_01778 | 20.6  | 19.5  | 25.0  | 46.5  | 44.2   | 49.4   | -1.11 | 4.31E-10 | 4.31E-09 | origin recognition complex subunit 6                  |
| 19258798 | MAA_04512 | 207.5 | 218.9 | 257.8 | 423.9 | 544.8  | 502.4  | -1.10 | 9.81E-16 | 1.51E-14 | PH domain containing protein                          |
| 19258891 | MAA_04605 | 35.0  | 45.1  | 33.5  | 75.5  | 88.6   | 79.1   | -1.10 | 6.19E-11 | 6.86E-10 | fungus specific transcription factor                  |
| 19255914 | MAA_01628 | 2.7   | 2.0   | 2.8   | 4.9   | 5.2    | 5.7    | -1.09 | 7.14E-04 | 2.65E-03 | Zn(2)-C6 fungal-type DNA-binding domain protein       |
| 19259249 | MAA_04963 | 20.9  | 17.2  | 17.6  | 31.3  | 55.7   | 31.1   | -1.09 | 4.33E-04 | 1.71E-03 | SMP-30/Gluconolactonase/LRE-like region               |
| 19259014 | MAA_04728 | 35.1  | 25.5  | 44.9  | 73.7  | 65.7   | 84.4   | -1.08 | 4.04E-07 | 2.71E-06 | hypothetical protein X797_001207                      |
| 23632201 | MAA_10752 | 23.9  | 16.9  | 14.0  | 43.8  | 36.0   | 36.1   | -1.08 | 4.82E-05 | 2.24E-04 | triacylglycerol lipase-like protein                   |
| 19259016 | MAA_04730 | 33.3  | 28.6  | 37.2  | 58.9  | 70.1   | 78.6   | -1.07 | 1.70E-10 | 1.79E-09 | glycoside hydrolase family 55                         |
| 19264916 | MAA_10630 | 28.2  | 29.3  | 31.7  | 53.5  | 78.5   | 54.6   | -1.07 | 2.94E-06 | 1.69E-05 | Zn(2)-Cys(6) zinc finger domain protein               |
| 19258971 | MAA_04685 | 390.8 | 372.5 | 254.6 | 569.6 | 838.7  | 720.0  | -1.06 | 1.48E-06 | 9.07E-06 | hypothetical protein MAA_04685                        |

|          |           |        |        |        |        |        |        |       |          |          |                                                                 |
|----------|-----------|--------|--------|--------|--------|--------|--------|-------|----------|----------|-----------------------------------------------------------------|
| 19256021 | MAA_01735 | 130.3  | 138.0  | 112.6  | 232.1  | 296.9  | 257.5  | -1.05 | 2.20E-12 | 2.71E-11 | histidine acid phosphatase                                      |
| 19259177 | MAA_04891 | 17.0   | 15.8   | 11.6   | 28.6   | 32.8   | 29.9   | -1.04 | 2.33E-06 | 1.38E-05 | CoA-transferase family III                                      |
| 19259099 | MAA_04813 | 419.6  | 410.0  | 437.7  | 786.1  | 929.3  | 887.6  | -1.04 | 2.07E-20 | 4.61E-19 | stress response RCI peptide                                     |
| 19256069 | MAA_01783 | 128.0  | 106.9  | 97.3   | 238.4  | 226.0  | 215.1  | -1.03 | 3.73E-13 | 4.76E-12 | hypothetical protein MAA_01783                                  |
| 19262863 | MAA_08577 | 10.5   | 6.6    | 8.7    | 16.8   | 19.6   | 16.2   | -1.03 | 1.94E-04 | 8.17E-04 | arginine metabolism regulation protein II                       |
| 19259142 | MAA_04856 | 403.1  | 356.9  | 392.2  | 684.8  | 910.3  | 748.3  | -1.02 | 1.76E-13 | 2.32E-12 | DUF323 domain protein                                           |
| 19259031 | MAA_04745 | 296.7  | 361.1  | 234.8  | 549.6  | 609.6  | 628.8  | -1.00 | 3.07E-09 | 2.74E-08 | glucose transporter                                             |
| 19256171 | MAA_01885 | 23.8   | 15.7   | 15.8   | 35.3   | 35.4   | 40.0   | -1.00 | 9.10E-06 | 4.76E-05 | amidase                                                         |
| 19258997 | MAA_04711 | 27.4   | 11.7   | 23.8   | 33.0   | 46.1   | 47.1   | -1.00 | 3.04E-03 | 9.44E-03 | PAP2 superfamily protein                                        |
| 19256626 | MAA_02340 | 1369.7 | 1359.2 | 1397.3 | 803.9  | 583.0  | 639.8  | 1.03  | 3.15E-21 | 7.35E-20 | Cytochrome P450 CYP541A4                                        |
| 19256543 | MAA_02257 | 1218.8 | 1221.8 | 1457.2 | 637.0  | 644.7  | 602.5  | 1.05  | 4.56E-31 | 2.10E-29 | DUF323 domain-containing protein                                |
| 19256518 | MAA_02232 | 122.3  | 106.4  | 129.1  | 61.5   | 50.4   | 61.0   | 1.05  | 1.01E-21 | 2.47E-20 | hypothetical protein MAA_02232                                  |
| 19262598 | MAA_08312 | 7353.4 | 7072.9 | 5661.1 | 3075.4 | 3391.0 | 3157.1 | 1.06  | 1.02E-19 | 2.15E-18 | cell wall protein                                               |
| 19261981 | MAA_07695 | 125.7  | 124.1  | 92.7   | 46.5   | 60.4   | 55.1   | 1.08  | 6.26E-10 | 6.17E-09 | mitochondrial chaperone BCS1                                    |
| 19264983 | MAA_10699 | 55.5   | 24.4   | 71.1   | 27.4   | 22.0   | 22.0   | 1.08  | 1.72E-03 | 5.72E-03 | methyltransferase                                               |
| 19264970 | MAA_10686 | 9853.3 | 7020.0 | 9760.5 | 4003.6 | 4485.7 | 4063.7 | 1.09  | 2.12E-16 | 3.41E-15 | WD repeat containing protein 44                                 |
| 19258894 | MAA_04608 | 226.6  | 210.9  | 215.0  | 101.2  | 102.8  | 100.9  | 1.10  | 1.58E-48 | 1.40E-46 | proteinrelated to alpha-glucosidase b                           |
| 19262600 | MAA_08314 | 512.1  | 672.4  | 354.8  | 194.7  | 274.0  | 238.8  | 1.12  | 5.37E-08 | 3.97E-07 | ATPase                                                          |
| 19262592 | MAA_08306 | 213.0  | 226.8  | 115.2  | 69.3   | 131.2  | 53.9   | 1.13  | 1.99E-02 | 4.83E-02 | Ankyrin repeat protein                                          |
| 19259107 | MAA_04821 | 8426.2 | 7870.8 | 8138.9 | 4071.9 | 3562.5 | 3530.3 | 1.13  | 1.31E-47 | 1.06E-45 | hypothetical protein MAA_04821                                  |
| 19264969 | MAA_10685 | 32.8   | 22.4   | 25.8   | 11.1   | 14.5   | 11.1   | 1.14  | 9.86E-08 | 7.07E-07 | hypothetical protein MAA_10685                                  |
| 19258794 | MAA_04508 | 162.7  | 153.7  | 168.7  | 75.1   | 65.3   | 77.6   | 1.15  | 3.93E-29 | 1.45E-27 | Translation Initiation factor eIF- 4e-like domain protein       |
| 19256606 | MAA_02320 | 359.8  | 294.6  | 278.0  | 121.7  | 141.5  | 150.6  | 1.17  | 7.10E-18 | 1.33E-16 | hypothetical protein MAA_02320                                  |
| 19259211 | MAA_04925 | 362.2  | 234.6  | 375.2  | 150.5  | 136.1  | 136.0  | 1.20  | 3.27E-13 | 4.20E-12 | mitochondrial chaperone BCS1                                    |
| 19262030 | MAA_07744 | 5.5    | 2.4    | 5.1    | 1.7    | 1.0    | 2.8    | 1.23  | 1.82E-02 | 4.49E-02 | glucose-methanol-choline oxidoreductase                         |
| 19259067 | MAA_04781 | 34.6   | 25.2   | 32.4   | 9.4    | 16.0   | 13.3   | 1.25  | 5.95E-07 | 3.90E-06 | hypothetical protein X797_001262                                |
| 19256624 | MAA_02338 | 1031.7 | 1043.2 | 999.0  | 502.9  | 400.0  | 374.0  | 1.27  | 9.22E-30 | 3.82E-28 | General substrate transporter                                   |
| 19256423 | MAA_02137 | 287.6  | 285.7  | 283.2  | 111.5  | 108.8  | 130.5  | 1.29  | 1.70E-37 | 1.12E-35 | hypothetical protein MAA_02137                                  |
| 19259108 | MAA_04822 | 4779.2 | 4026.0 | 5271.3 | 2129.3 | 1733.4 | 1866.8 | 1.30  | 6.68E-32 | 3.23E-30 | Regulator of G protein signaling superfamily                    |
| 19259240 | MAA_04954 | 901.5  | 955.9  | 951.5  | 455.0  | 292.7  | 366.8  | 1.33  | 3.21E-24 | 9.17E-23 | Cytochrome P450 CYP6001C17                                      |
| 19256584 | MAA_02298 | 126.3  | 113.6  | 127.3  | 47.8   | 50.3   | 47.3   | 1.34  | 9.36E-53 | 9.04E-51 | Signal transduction response regulator, receiver domain protein |
| 19256537 | MAA_02251 | 1105.7 | 960.5  | 926.8  | 482.4  | 364.5  | 334.9  | 1.34  | 4.15E-22 | 1.03E-20 | chromosomal organization and DNA repair protein Mms21           |
| 19258920 | MAA_04634 | 129.5  | 104.0  | 123.4  | 43.3   | 59.3   | 36.5   | 1.36  | 2.29E-10 | 2.35E-09 | p-hydroxylaminobenzoate lyase                                   |

|          |           |         |         |         |        |        |        |       |           |           |                                                                     |
|----------|-----------|---------|---------|---------|--------|--------|--------|-------|-----------|-----------|---------------------------------------------------------------------|
| 19263120 | MAA_08834 | 86.9    | 76.5    | 92.4    | 33.9   | 33.1   | 32.4   | 1.36  | 7.60E-46  | 5.71E-44  | multidrug resistance-associated protein 1                           |
| 19256202 | MAA_01916 | 678.7   | 584.5   | 484.5   | 214.9  | 228.3  | 222.3  | 1.39  | 3.20E-22  | 8.01E-21  | hypothetical protein X797_000234                                    |
| 19262006 | MAA_07720 | 10.6    | 26.4    | 12.2    | 6.2    | 6.7    | 5.2    | 1.44  | 3.19E-04  | 1.29E-03  | hypothetical protein MAA_07720                                      |
| 19256694 | MAA_02408 | 1321.1  | 1488.1  | 1540.1  | 615.0  | 519.8  | 462.2  | 1.45  | 1.51E-36  | 8.99E-35  | Peptidase S8/S53, subtilisin/kexin/sedolisin                        |
| 19255933 | MAA_01647 | 40.7    | 46.5    | 51.1    | 17.0   | 15.3   | 18.3   | 1.45  | 3.13E-27  | 1.08E-25  | protein kinase                                                      |
| 19263164 | MAA_08878 | 174.4   | 100.2   | 177.6   | 61.9   | 52.8   | 50.3   | 1.45  | 1.86E-13  | 2.44E-12  | hypothetical protein MAA_08878                                      |
| 19259139 | MAA_04853 | 457.5   | 529.5   | 327.0   | 164.0  | 158.1  | 146.5  | 1.49  | 1.27E-19  | 2.62E-18  | hypothetical protein MAA_04853                                      |
| 19256744 | MAA_02458 | 106.3   | 106.6   | 109.0   | 39.4   | 38.5   | 32.2   | 1.55  | 4.65E-25  | 1.39E-23  | hypothetical protein MAA_02458                                      |
| 19256001 | MAA_01715 | 448.4   | 200.1   | 398.7   | 131.7  | 109.7  | 102.1  | 1.61  | 1.75E-11  | 1.98E-10  | DOMON domain protein                                                |
| 19262895 | MAA_08609 | 2878.5  | 1498.2  | 2393.8  | 882.3  | 685.4  | 639.3  | 1.62  | 1.39E-15  | 2.10E-14  | Alpha/beta hydrolase fold-3                                         |
| 19263648 | MAA_09362 | 2771.5  | 2182.3  | 3248.5  | 901.3  | 785.3  | 721.4  | 1.77  | 1.46E-35  | 7.79E-34  | SAM-dependent methyltransferase                                     |
| 19255990 | MAA_01704 | 12.4    | 7.7     | 13.0    | 2.4    | 4.3    | 3.0    | 1.78  | 5.32E-06  | 2.92E-05  | hypothetical protein MAA_01704                                      |
| 19258824 | MAA_04538 | 155.9   | 175.0   | 186.9   | 53.3   | 43.0   | 50.5   | 1.82  | 6.99E-67  | 9.45E-65  | CP2 transcription factor                                            |
| 19255996 | MAA_01710 | 558.4   | 362.8   | 879.6   | 179.8  | 144.8  | 184.0  | 1.82  | 1.85E-07  | 1.28E-06  | hypothetical protein MAA_01710                                      |
| 19262634 | MAA_08348 | 2.3     | 3.8     | 2.7     | 0.5    | 1.1    | 0.7    | 1.96  | 4.28E-03  | 1.29E-02  | phytanoyl-CoA dioxygenase                                           |
| 19262891 | MAA_08605 | 5.9     | 6.8     | 7.3     | 1.0    | 3.5    | 0.2    | 2.08  | 5.42E-03  | 1.57E-02  | hypothetical protein MAA_08605                                      |
| 19262913 | MAA_08627 | 7.1     | 7.4     | 8.0     | 1.5    | 1.0    | 2.4    | 2.18  | 1.24E-05  | 6.35E-05  | hypothetical protein MAA_08627                                      |
| 19256536 | MAA_02250 | 14168.7 | 12149.4 | 16851.2 | 3462.8 | 2773.7 | 2657.6 | 2.28  | 5.02E-64  | 6.37E-62  | PAS domain containing protein                                       |
| 19256328 | MAA_02042 | 1989.2  | 1311.1  | 1488.6  | 397.5  | 306.7  | 277.3  | 2.29  | 6.26E-40  | 4.38E-38  | 3-oxo-5-alpha-steroid 4-dehydrogenase                               |
| 19256607 | MAA_02321 | 250.6   | 141.7   | 384.9   | 49.5   | 56.3   | 47.5   | 2.34  | 6.05E-18  | 1.15E-16  | Major facilitator superfamily domain, general substrate transporter |
| 19263645 | MAA_09359 | 14.6    | 17.3    | 17.7    | 3.3    | 1.8    | 3.4    | 2.54  | 6.72E-30  | 2.84E-28  | Pfs, NACHT and WD domain protein                                    |
| 19259066 | MAA_04780 | 21.8    | 17.2    | 19.4    | 2.2    | 5.5    | 1.8    | 2.60  | 9.72E-10  | 9.35E-09  | hypothetical protein MAA_04780                                      |
| 19259065 | MAA_04779 | 7.2     | 8.1     | 11.6    | 0.8    | 1.0    | 0.8    | 3.37  | 9.28E-23  | 2.45E-21  | hypothetical protein MAA_04779                                      |
| 19263644 | MAA_09358 | 2554.8  | 3029.2  | 3175.7  | 302.8  | 245.0  | 252.1  | 3.45  | 3.70E-209 | 2.50E-206 | hypothetical protein MAA_09358                                      |
| 19256297 | MAA_02011 | 31.1    | 20.1    | 26.5    | 2.1    | 2.2    | 0.9    | 3.91  | 2.90E-17  | 5.11E-16  | hypothetical protein MAA_02011                                      |
| 19263643 | MAA_09357 | 931.7   | 966.2   | 1214.5  | 73.1   | 47.3   | 48.8   | 4.20  | 5.62E-142 | 2.28E-139 | hypothetical protein X797_010135                                    |
| 19263642 | MAA_09356 | 6633.0  | 7477.7  | 8392.6  | 549.2  | 325.8  | 338.3  | 4.21  | 3.54E-123 | 7.98E-121 | hemeolysin E                                                        |
| 19264933 | MAA_10648 | 11.1    | 0.0     | 8.5     | 0.0    | 0.0    | 0.0    | 16.00 | 8.34E-03  | 2.30E-02  | ATPase domain, prokaryote                                           |

**Table S3.** A list of differentially expressed genes identified from the  $\Delta abaA$ -1 mutant versus the WT strain of *M. roberstii*.

| Gene_id  | Gene_name | FPKM             |                  |                  | FPKM    |         |         | $\Delta abaA$ /WT |           |           | Description                                                 |
|----------|-----------|------------------|------------------|------------------|---------|---------|---------|-------------------|-----------|-----------|-------------------------------------------------------------|
|          |           | $\Delta abaA$ _1 | $\Delta abaA$ _2 | $\Delta abaA$ _3 | WT_1    | WT_2    | WT_3    | log2 R            | p-value   | q-value   |                                                             |
| 19256296 | MAA_02010 | 0.0              | 0.0              | 0.0              | 4.4     | 6.8     | 4.7     | -15.69            | 3.52E-12  | 3.94E-11  | Amino acid transporter, transmembrane                       |
| 19262897 | MAA_08611 | 0.0              | 0.0              | 0.0              | 4.6     | 5.9     | 3.7     | -15.53            | 6.75E-09  | 5.04E-08  | hypothetical protein X797_008967                            |
| 19255911 | MAA_01625 | 0.0              | 0.0              | 0.0              | 1.1     | 1.3     | 0.7     | -13.34            | 1.85E-03  | 5.67E-03  | Thioesterase                                                |
| 19262625 | MAA_08339 | 1.1              | 0.0              | 10.9             | 7189.7  | 11527.9 | 8575.0  | -11.15            | 5.39E-12  | 5.74E-11  | hypothetical protein MAA_08339                              |
| 19263637 | MAA_09351 | 15.6             | 31.8             | 65.1             | 48866.7 | 83933.1 | 58904.2 | -10.73            | 7.36E-70  | 8.27E-68  | hypothetical protein MAA_09351                              |
| 19259048 | MAA_04762 | 0.7              | 1.3              | 2.1              | 622.7   | 1036.0  | 809.9   | -9.19             | 4.38E-90  | 7.38E-88  | Multicopper oxidase, copper-binding site                    |
| 19262594 | MAA_08308 | 0.1              | 0.0              | 0.0              | 17.9    | 28.0    | 19.4    | -9.18             | 8.32E-17  | 1.37E-15  | Peptidase aspartic, active site protein                     |
| 19259151 | MAA_04865 | 0.4              | 0.0              | 0.6              | 127.5   | 195.1   | 109.4   | -8.85             | 5.11E-42  | 2.35E-40  | Peptidoglycan-binding lysin domain protein                  |
| 19264886 | MAA_10600 | 0.2              | 0.0              | 0.0              | 5.1     | 5.4     | 1.5     | -6.30             | 4.26E-07  | 2.48E-06  | proteinrelated to zinc finger protein odd-paired-like (opl) |
| 19264873 | MAA_10587 | 0.1              | 0.0              | 0.0              | 0.0     | 1.7     | 1.1     | -5.55             | 8.50E-03  | 2.15E-02  | O-methyltransferase, family 2                               |
| 19264888 | MAA_10602 | 0.6              | 0.0              | 0.0              | 7.1     | 9.7     | 11.9    | -5.55             | 4.28E-07  | 2.48E-06  | subtilisin-like protease                                    |
| 19258736 | MAA_04450 | 14.2             | 13.6             | 9.2              | 508.7   | 612.8   | 408.8   | -5.37             | 2.61E-185 | 1.32E-182 | Glycoside hydrolase, superfamily                            |
| 19262028 | MAA_07742 | 0.2              | 0.0              | 0.0              | 2.3     | 5.5     | 0.4     | -5.36             | 2.24E-04  | 8.10E-04  | subtilisin-like protease                                    |
| 19264949 | MAA_10665 | 44.5             | 43.7             | 59.0             | 1578.2  | 1999.0  | 1677.9  | -5.16             | 2.00E-303 | 5.00E-300 | hypothetical protein X797_001079                            |
| 19258931 | MAA_04645 | 7.1              | 11.1             | 17.1             | 238.8   | 548.6   | 458.8   | -5.14             | 1.53E-27  | 4.26E-26  | GPR1/FUN34/yaaH family protein                              |
| 19263638 | MAA_09352 | 0.4              | 0.7              | 1.0              | 14.0    | 30.8    | 28.1    | -5.08             | 1.35E-28  | 4.09E-27  | hypothetical protein MAA_09352                              |
| 19255910 | MAA_01624 | 0.0              | 0.0              | 0.2              | 1.0     | 2.2     | 1.8     | -4.96             | 8.74E-05  | 3.45E-04  | LysR family regulatory protein                              |
| 19255960 | MAA_01674 | 0.9              | 1.6              | 1.3              | 18.6    | 42.7    | 25.5    | -4.53             | 2.18E-16  | 3.48E-15  | Endoribonuclease L-PSP/chorismate mutase-like protein       |
| 19261999 | MAA_07713 | 0.7              | 3.9              | 1.0              | 20.9    | 51.3    | 27.5    | -4.16             | 2.59E-12  | 2.98E-11  | hypothetical protein MAA_07713                              |
| 19262633 | MAA_08347 | 0.0              | 0.4              | 0.0              | 1.9     | 1.7     | 2.7     | -4.10             | 1.20E-03  | 3.79E-03  | phytanoyl-CoA dioxygenase                                   |
| 19262627 | MAA_08341 | 1.1              | 0.0              | 0.3              | 4.2     | 11.6    | 4.6     | -3.84             | 1.15E-06  | 6.34E-06  | hypothetical protein MAA_08341                              |
| 19262027 | MAA_07741 | 129.6            | 134.9            | 97.3             | 1583.4  | 1903.4  | 1664.4  | -3.83             | 2.24E-187 | 1.51E-184 | Formate/nitrite transporter                                 |
| 19262899 | MAA_08613 | 166.2            | 195.5            | 197.7            | 1995.8  | 2517.0  | 1934.8  | -3.53             | 3.29E-162 | 1.33E-159 | ntf2-like domain protein                                    |
| 19263092 | MAA_08806 | 2.1              | 1.8              | 4.7              | 34.4    | 39.2    | 21.4    | -3.44             | 1.67E-21  | 3.59E-20  | Aminoglycoside phosphotransferase                           |
| 19263635 | MAA_09349 | 1.2              | 1.0              | 0.6              | 11.7    | 8.5     | 8.3     | -3.37             | 2.37E-19  | 4.44E-18  | hypothetical protein X797_010127                            |
| 19256738 | MAA_02452 | 1.7              | 0.5              | 0.0              | 6.2     | 7.7     | 8.7     | -3.33             | 6.87E-05  | 2.78E-04  | alcohol dehydrogenase                                       |
| 19256645 | MAA_02359 | 440.9            | 456.6            | 437.2            | 4512.0  | 4602.1  | 3591.3  | -3.25             | 2.07E-198 | 2.10E-195 | Carbohydrate-binding WSC                                    |
| 19255923 | MAA_01637 | 1.8              | 3.1              | 0.8              | 5.8     | 18.9    | 28.4    | -3.20             | 1.37E-07  | 8.62E-07  | hypothetical protein MAA_01637                              |
| 19259312 | MAA_05026 | 36.5             | 40.3             | 45.6             | 331.4   | 404.1   | 332.5   | -3.13             | 3.37E-118 | 8.53E-116 | galactosyltransferase superfamily protein                   |

|          |           |       |       |       |        |        |        |       |           |           |                                                                    |
|----------|-----------|-------|-------|-------|--------|--------|--------|-------|-----------|-----------|--------------------------------------------------------------------|
| 19255920 | MAA_01634 | 0.8   | 0.0   | 0.0   | 0.5    | 3.7    | 2.4    | -3.09 | 1.64E-02  | 3.81E-02  | aminoglycoside 3'-phosphotransferase/choline kinase domain protein |
| 19256662 | MAA_02376 | 14.8  | 19.3  | 23.5  | 136.5  | 202.9  | 149.7  | -3.09 | 2.22E-56  | 1.73E-54  | Aromatic-ring hydroxylase-like protein                             |
| 19258964 | MAA_04678 | 446.4 | 338.2 | 210.8 | 2956.7 | 2508.1 | 2711.8 | -3.04 | 1.40E-24  | 3.35E-23  | ATPase, F0 complex, subunit C, DCCD-binding site                   |
| 19262004 | MAA_07718 | 1.8   | 2.6   | 0.0   | 5.5    | 18.1   | 12.6   | -3.04 | 1.00E-03  | 3.19E-03  | hypothetical protein MAA_07718                                     |
| 19255951 | MAA_01665 | 0.0   | 0.2   | 0.2   | 1.9    | 0.8    | 0.7    | -3.02 | 4.72E-03  | 1.29E-02  | collagen-like protein Mcl1                                         |
| 19263091 | MAA_08805 | 4.6   | 2.2   | 3.6   | 22.9   | 33.2   | 22.1   | -2.90 | 9.73E-11  | 8.95E-10  | IDI-2 precursor                                                    |
| 19256187 | MAA_01901 | 6.6   | 3.8   | 7.6   | 40.3   | 50.7   | 37.7   | -2.83 | 2.65E-20  | 5.21E-19  | DUF967 domain protein                                              |
| 19263636 | MAA_09350 | 0.7   | 1.5   | 0.4   | 6.7    | 6.7    | 5.2    | -2.83 | 5.67E-12  | 6.01E-11  | hypothetical protein MAA_09350                                     |
| 19262656 | MAA_08370 | 5.2   | 8.2   | 1.0   | 23.6   | 41.8   | 35.7   | -2.82 | 2.24E-04  | 8.10E-04  | polyketide synthase                                                |
| 19259129 | MAA_04843 | 12.1  | 11.2  | 13.1  | 74.9   | 94.0   | 71.8   | -2.73 | 1.87E-66  | 2.00E-64  | Basic-leucine zipper (bZIP) transcription factor                   |
| 19264993 | MAA_10709 | 6.7   | 7.4   | 5.6   | 43.2   | 45.7   | 38.1   | -2.68 | 4.63E-56  | 3.35E-54  | nicotinamide N-methyltransferase                                   |
| 19255928 | MAA_01642 | 0.8   | 2.5   | 0.4   | 2.5    | 7.9    | 12.7   | -2.68 | 4.18E-03  | 1.16E-02  | fatty acid synthase subunit alpha reductase                        |
| 19264986 | MAA_10702 | 1.9   | 2.9   | 0.7   | 12.2   | 11.5   | 11.2   | -2.66 | 2.79E-11  | 2.81E-10  | D-xylulose reductase A                                             |
| 19256325 | MAA_02039 | 44.7  | 51.2  | 31.9  | 239.7  | 298.2  | 228.3  | -2.58 | 8.67E-47  | 5.02E-45  | Glutathione S-transferase/chloride channel                         |
| 19258976 | MAA_04690 | 2.5   | 5.7   | 3.5   | 15.6   | 24.0   | 29.7   | -2.57 | 1.24E-14  | 1.73E-13  | DUF1479 domain protein                                             |
| 19258823 | MAA_04537 | 12.7  | 9.9   | 11.6  | 65.8   | 74.1   | 61.5   | -2.56 | 2.22E-63  | 2.14E-61  | Major facilitator superfamily domain protein                       |
| 19256699 | MAA_02413 | 117.3 | 91.6  | 46.9  | 551.1  | 424.9  | 499.3  | -2.53 | 1.02E-12  | 1.23E-11  | C4-dicarboxylate transporter/malic acid transporter                |
| 19256169 | MAA_01883 | 27.0  | 23.8  | 20.9  | 129.0  | 139.0  | 128.3  | -2.47 | 1.66E-109 | 3.73E-107 | ABC-2 type transporter                                             |
| 19256403 | MAA_02117 | 84.3  | 92.5  | 84.4  | 531.4  | 454.0  | 459.4  | -2.47 | 1.90E-134 | 6.41E-132 | Short-chain dehydrogenase/reductase SDR                            |
| 19263676 | MAA_09390 | 132.2 | 116.1 | 135.6 | 709.1  | 784.2  | 611.8  | -2.46 | 1.55E-78  | 2.24E-76  | putative protein family Cys-rich                                   |
| 23632178 | MAA_10729 | 4.6   | 8.7   | 1.8   | 25.5   | 36.7   | 20.1   | -2.45 | 1.54E-04  | 5.76E-04  | hypothetical protein MAA_10729                                     |
| 19255925 | MAA_01639 | 1.3   | 3.6   | 1.2   | 3.5    | 8.0    | 18.4   | -2.31 | 3.65E-03  | 1.04E-02  | peptide synthetase                                                 |
| 19256017 | MAA_01731 | 246.2 | 228.8 | 282.4 | 1123.5 | 1211.9 | 964.7  | -2.12 | 4.08E-77  | 5.51E-75  | multicopper oxidase                                                |
| 19256766 | MAA_02480 | 21.8  | 25.6  | 26.6  | 104.8  | 120.2  | 96.9   | -2.12 | 6.18E-63  | 5.21E-61  | NAD-specific glutamate dehydrogenase                               |
| 19262572 | MAA_08286 | 3.1   | 2.3   | 3.6   | 8.6    | 19.1   | 11.3   | -2.11 | 1.55E-07  | 9.70E-07  | dehydrogenase/reductase SDR family                                 |
| 19256307 | MAA_02021 | 12.0  | 3.2   | 6.5   | 25.2   | 39.8   | 25.1   | -2.05 | 9.72E-06  | 4.57E-05  | hypothetical protein MAA_02021                                     |
| 19262592 | MAA_08306 | 36.6  | 20.5  | 5.2   | 69.3   | 131.2  | 53.9   | -2.03 | 1.06E-02  | 2.63E-02  | Ankyrin repeat protein                                             |
| 19259268 | MAA_04982 | 7.9   | 10.8  | 7.3   | 32.8   | 35.1   | 36.9   | -2.01 | 3.35E-27  | 8.92E-26  | protein-arginine deiminase type-4                                  |
| 19255921 | MAA_01635 | 3.1   | 6.3   | 1.0   | 10.6   | 14.2   | 14.5   | -1.92 | 1.22E-04  | 4.66E-04  | integral membrane protein pth11                                    |
| 19256739 | MAA_02453 | 26.2  | 23.8  | 24.7  | 76.6   | 114.5  | 83.3   | -1.88 | 1.67E-33  | 6.05E-32  | arrestin domain-containing protein                                 |
| 19256386 | MAA_02100 | 132.6 | 153.9 | 98.0  | 451.1  | 450.7  | 486.8  | -1.85 | 9.93E-39  | 4.37E-37  | branched chain aminotransferase                                    |
| 19258999 | MAA_04713 | 28.7  | 26.3  | 20.3  | 60.1   | 116.4  | 95.0   | -1.85 | 3.30E-12  | 3.73E-11  | hypothetical protein MAA_04713                                     |
| 19259036 | MAA_04750 | 18.7  | 12.3  | 9.5   | 36.6   | 55.4   | 52.9   | -1.83 | 2.42E-10  | 2.10E-09  |                                                                    |

|          |           |        |        |        |        |        |        |       |          |          |                                                         |
|----------|-----------|--------|--------|--------|--------|--------|--------|-------|----------|----------|---------------------------------------------------------|
| 19264926 | MAA_10641 | 156.3  | 203.4  | 177.2  | 630.6  | 652.9  | 577.2  | -1.79 | 3.82E-48 | 2.35E-46 | carbohydrate esterase family 1 protein                  |
| 19255930 | MAA_01644 | 90.4   | 147.9  | 50.9   | 126.2  | 301.6  | 543.2  | -1.75 | 8.59E-03 | 2.16E-02 | RTA-like protein                                        |
| 19255939 | MAA_01653 | 1.9    | 7.6    | 3.5    | 6.4    | 13.4   | 23.7   | -1.74 | 4.93E-03 | 1.33E-02 | hypothetical protein MAA_01653                          |
| 19262912 | MAA_08626 | 2.1    | 1.5    | 1.0    | 6.5    | 5.0    | 3.8    | -1.74 | 5.00E-04 | 1.70E-03 | Protein kinase-like protein                             |
| 19256313 | MAA_02027 | 5.8    | 8.0    | 5.9    | 15.0   | 26.4   | 22.2   | -1.69 | 4.45E-08 | 3.02E-07 | hypothetical protein MAA_02027                          |
| 23632179 | MAA_10730 | 27.6   | 37.9   | 29.9   | 82.4   | 129.8  | 93.5   | -1.68 | 3.46E-15 | 5.12E-14 | Bromodomain protein                                     |
| 19262613 | MAA_08327 | 140.1  | 114.3  | 108.8  | 329.4  | 464.6  | 352.9  | -1.66 | 6.23E-29 | 1.91E-27 | hypothetical protein MAA_08327                          |
| 19263129 | MAA_08843 | 7.5    | 5.2    | 3.3    | 8.9    | 16.7   | 24.5   | -1.64 | 1.38E-02 | 3.27E-02 | hypothetical protein MAA_08843                          |
| 19256663 | MAA_02377 | 20.2   | 20.6   | 24.6   | 61.8   | 53.3   | 85.8   | -1.62 | 1.35E-24 | 3.30E-23 | ATP-binding cassette transporter ifT1                   |
| 19262014 | MAA_07728 | 75.4   | 83.6   | 80.2   | 227.0  | 266.7  | 236.2  | -1.61 | 2.71E-52 | 1.83E-50 | transmembrane amino acid transporter                    |
| 19255924 | MAA_01638 | 3.4    | 6.8    | 5.3    | 6.1    | 12.5   | 27.5   | -1.57 | 1.28E-02 | 3.09E-02 | canalicular multispecific organic anion transporter 1   |
| 19256685 | MAA_02399 | 104.8  | 152.2  | 129.3  | 337.9  | 313.3  | 478.8  | -1.55 | 1.19E-22 | 2.70E-21 | ATPase, P-type phosphorylation site                     |
| 19256213 | MAA_01927 | 3.1    | 1.6    | 2.2    | 6.0    | 7.4    | 7.0    | -1.55 | 2.65E-04 | 9.42E-04 | hypothetical protein MAA_01927                          |
| 19263667 | MAA_09381 | 25.3   | 28.8   | 10.5   | 43.7   | 76.0   | 69.0   | -1.55 | 3.31E-06 | 1.69E-05 | protoporphyrinogen oxidase                              |
| 19258970 | MAA_04684 | 266.1  | 175.1  | 158.5  | 570.9  | 584.9  | 570.6  | -1.53 | 1.49E-20 | 2.96E-19 | arginase-like protein                                   |
| 19256376 | MAA_02090 | 98.7   | 89.0   | 107.1  | 236.9  | 338.9  | 261.1  | -1.51 | 1.63E-22 | 3.66E-21 | GCN5-related N-acetyltransferase (GNAT) domain protein  |
| 19256065 | MAA_01779 | 141.8  | 141.0  | 182.4  | 408.0  | 465.8  | 439.0  | -1.50 | 1.34E-32 | 4.78E-31 | EF-Hand 1, calcium-binding site                         |
| 19258785 | MAA_04499 | 134.5  | 134.0  | 127.6  | 299.6  | 441.2  | 362.5  | -1.48 | 2.25E-28 | 6.61E-27 | pyruvate decarboxylase                                  |
| 19259303 | MAA_05017 | 2460.7 | 2701.3 | 2098.2 | 5408.9 | 7974.6 | 6431.8 | -1.45 | 7.17E-25 | 1.77E-23 | Extracellular membrane protein, CFEM domain protein     |
| 19256318 | MAA_02032 | 19.5   | 19.6   | 18.7   | 47.6   | 63.1   | 43.9   | -1.42 | 4.70E-16 | 7.22E-15 | 3-phytase                                               |
| 19256335 | MAA_02049 | 112.1  | 125.7  | 101.4  | 295.4  | 277.6  | 325.4  | -1.41 | 2.64E-32 | 9.20E-31 | hypothetical protein MAA_02049                          |
| 23632205 | MAA_10756 | 38.6   | 38.0   | 46.8   | 138.2  | 89.8   | 97.5   | -1.40 | 9.49E-15 | 1.35E-13 | hypothetical protein MAA_10756                          |
| 19259267 | MAA_04981 | 10.8   | 10.3   | 11.5   | 29.1   | 31.4   | 25.2   | -1.40 | 4.18E-13 | 5.16E-12 | Extracellular membrane protein, 8-cysteine region, CFEM |
| 19262896 | MAA_08610 | 1.5    | 1.1    | 1.6    | 3.0    | 4.6    | 3.2    | -1.34 | 3.91E-03 | 1.10E-02 | Protein kinase domain containing protein                |
| 19255927 | MAA_01641 | 17.9   | 21.4   | 18.4   | 30.6   | 41.4   | 71.8   | -1.32 | 9.44E-07 | 5.28E-06 | ankyrin repeat protein                                  |
| 19259074 | MAA_04788 | 57.4   | 76.1   | 47.0   | 113.4  | 178.6  | 154.2  | -1.31 | 5.00E-10 | 4.14E-09 | dopa 4,5-dioxygenase                                    |
| 19256283 | MAA_01997 | 26.2   | 30.8   | 24.8   | 64.9   | 74.5   | 62.6   | -1.30 | 3.59E-18 | 6.25E-17 | Carboxylesterase type B, active site protein            |
| 19255915 | MAA_01629 | 8.1    | 5.8    | 6.1    | 12.8   | 15.1   | 21.3   | -1.30 | 2.30E-04 | 8.28E-04 | GCN5-related N-acetyltransferase (GNAT) domain protein  |
| 19263640 | MAA_09354 | 2.2    | 2.6    | 2.4    | 4.0    | 8.1    | 5.5    | -1.29 | 1.82E-02 | 4.13E-02 | C6 transcription factor (Acr-2)                         |
| 19262898 | MAA_08612 | 130.3  | 131.7  | 113.4  | 294.3  | 352.2  | 269.7  | -1.29 | 1.45E-20 | 2.90E-19 | flavodoxin-like protein                                 |
| 19263633 | MAA_09347 | 5.5    | 10.1   | 6.6    | 15.8   | 22.7   | 15.2   | -1.28 | 1.24E-04 | 4.72E-04 | transmembrane amino acid transporter                    |
| 19258968 | MAA_04682 | 152.2  | 108.5  | 84.2   | 273.7  | 265.5  | 295.6  | -1.28 | 5.81E-14 | 7.65E-13 | hypothetical protein MAA_04682                          |
| 19264966 | MAA_10682 | 21.0   | 18.7   | 14.4   | 35.5   | 42.6   | 52.7   | -1.27 | 2.63E-12 | 3.01E-11 | WD40 domain protein                                     |

|          |           |        |        |        |        |        |        |       |          |          |                                                                     |
|----------|-----------|--------|--------|--------|--------|--------|--------|-------|----------|----------|---------------------------------------------------------------------|
| 19262017 | MAA_07731 | 56.1   | 56.6   | 56.1   | 135.8  | 144.9  | 123.5  | -1.26 | 1.97E-27 | 5.31E-26 | integral membrane protein                                           |
| 19264975 | MAA_10691 | 5.9    | 5.6    | 10.0   | 15.0   | 18.6   | 16.8   | -1.23 | 1.72E-05 | 7.83E-05 | S-adenosyl-L-methionine-dependent methyltransferase                 |
| 19262582 | MAA_08296 | 30.4   | 27.0   | 44.6   | 92.3   | 64.3   | 80.7   | -1.22 | 3.46E-06 | 1.75E-05 | phosphotransferase                                                  |
| 19256511 | MAA_02225 | 110.2  | 126.4  | 114.9  | 278.7  | 273.4  | 263.8  | -1.22 | 5.99E-43 | 2.82E-41 | electron transfer flavoprotein                                      |
| 19256693 | MAA_02407 | 17.8   | 22.1   | 17.8   | 49.1   | 44.1   | 40.2   | -1.21 | 1.49E-12 | 1.75E-11 | Bicupin, oxalate decarboxylase/oxidase                              |
| 19259153 | MAA_04867 | 6.6    | 7.4    | 4.5    | 15.2   | 13.5   | 14.0   | -1.21 | 2.92E-06 | 1.50E-05 | Pyridine nucleotide-disulfide oxidoreductase                        |
| 19256036 | MAA_01750 | 425.7  | 516.4  | 421.9  | 1068.2 | 1064.4 | 1004.6 | -1.20 | 6.60E-32 | 2.23E-30 | bacterial-type extracellular deoxyribonuclease                      |
| 19262856 | MAA_08570 | 120.3  | 111.6  | 146.7  | 225.4  | 374.2  | 270.5  | -1.20 | 1.07E-10 | 9.74E-10 | glyoxalase family protein                                           |
| 19256221 | MAA_01935 | 25.0   | 32.7   | 18.2   | 44.4   | 58.0   | 70.6   | -1.19 | 2.57E-08 | 1.80E-07 | integral membrane protein                                           |
| 19259195 | MAA_04909 | 68.5   | 74.2   | 73.4   | 133.5  | 185.0  | 167.0  | -1.17 | 3.06E-18 | 5.38E-17 | major facilitator superfamily transporter                           |
| 19259203 | MAA_04917 | 38.1   | 45.9   | 31.9   | 85.2   | 101.1  | 71.2   | -1.15 | 1.21E-06 | 6.64E-06 | Stress responsive alpha-beta barrel                                 |
| 19258996 | MAA_04710 | 155.7  | 146.3  | 62.9   | 171.3  | 319.4  | 312.5  | -1.14 | 1.41E-02 | 3.35E-02 | Glutathione S-transferase/chloride channel                          |
| 19265003 | MAA_10719 | 57.9   | 57.3   | 82.5   | 158.9  | 111.8  | 163.5  | -1.14 | 4.58E-11 | 4.50E-10 | YTH domain protein                                                  |
| 19258971 | MAA_04685 | 347.5  | 358.1  | 268.5  | 569.6  | 838.7  | 720.0  | -1.13 | 1.74E-12 | 2.03E-11 | hypothetical protein MAA_04685                                      |
| 19259152 | MAA_04866 | 48.9   | 70.3   | 64.5   | 120.5  | 148.7  | 129.0  | -1.12 | 4.95E-12 | 5.33E-11 | SAM-dependent methyltransferase                                     |
| 19256469 | MAA_02183 | 2495.5 | 2680.1 | 4165.8 | 4145.2 | 9244.2 | 6771.9 | -1.11 | 4.69E-03 | 1.28E-02 | Glucose-repressible protein Grg1                                    |
| 19261930 | MAA_07644 | 226.4  | 213.4  | 248.2  | 423.1  | 540.6  | 513.6  | -1.10 | 2.89E-21 | 6.10E-20 | hypothetical protein MAA_07644                                      |
| 19262026 | MAA_07740 | 11.1   | 18.5   | 10.2   | 23.9   | 36.5   | 24.8   | -1.10 | 6.41E-05 | 2.62E-04 | muconate cycloisomerase I, MLE                                      |
| 19263682 | MAA_09396 | 381.7  | 416.6  | 416.2  | 763.4  | 971.8  | 804.9  | -1.06 | 1.89E-22 | 4.22E-21 | Alcohol dehydrogenase superfamily, zinc-type                        |
| 19263639 | MAA_09353 | 34.8   | 27.8   | 21.1   | 49.9   | 62.5   | 62.1   | -1.06 | 2.62E-07 | 1.58E-06 | hypothetical protein MAA_09353                                      |
| 19256239 | MAA_01953 | 4.8    | 5.4    | 4.8    | 9.7    | 10.0   | 11.2   | -1.05 | 1.28E-04 | 4.86E-04 | dipeptidyl aminopeptidase/acylaminoacyl peptidase                   |
| 19259294 | MAA_05008 | 10.2   | 8.4    | 6.4    | 16.3   | 18.1   | 16.7   | -1.04 | 2.93E-05 | 1.27E-04 | taurine catabolism dioxygenase TauD                                 |
| 19258994 | MAA_04708 | 46.3   | 59.1   | 34.0   | 94.0   | 87.6   | 104.0  | -1.03 | 4.32E-09 | 3.29E-08 | Major facilitator superfamily domain, general substrate transporter |
| 19256130 | MAA_01844 | 118.0  | 85.3   | 115.8  | 233.0  | 201.4  | 215.5  | -1.03 | 2.16E-13 | 2.70E-12 | cytochrome oxidase assembly                                         |
| 19259233 | MAA_04947 | 7.6    | 7.6    | 5.1    | 14.1   | 12.9   | 14.3   | -1.02 | 5.53E-03 | 1.47E-02 | DSBA-like thioredoxin domain-containing protein                     |
| 19256013 | MAA_01727 | 17.2   | 12.3   | 13.2   | 23.6   | 26.0   | 36.4   | -1.01 | 1.78E-04 | 6.56E-04 | meiosis protein SPO22/ZIP4 like protein                             |
| 19256285 | MAA_01999 | 152.1  | 135.7  | 152.4  | 289.8  | 288.0  | 306.5  | -1.01 | 9.57E-28 | 2.69E-26 | AoPex11B-like protein                                               |
| 19264954 | MAA_10670 | 183.9  | 208.1  | 168.1  | 53.2   | 96.5   | 130.2  | 1.00  | 1.62E-04 | 6.05E-04 | hypothetical protein MAA_10670                                      |
| 19262604 | MAA_08318 | 227.4  | 233.1  | 274.9  | 102.9  | 135.2  | 127.9  | 1.01  | 1.53E-14 | 2.09E-13 | pH-response regulator protein palA/RIM20                            |
| 19261966 | MAA_07680 | 536.1  | 619.2  | 635.3  | 308.9  | 276.3  | 304.0  | 1.01  | 3.00E-22 | 6.53E-21 | hypothetical protein MAA_07680                                      |
| 19263130 | MAA_08844 | 8.7    | 10.5   | 6.1    | 3.7    | 2.8    | 6.1    | 1.01  | 1.44E-02 | 3.39E-02 | ATP-grasp fold protein                                              |
| 19263683 | MAA_09397 | 6178.5 | 6560.2 | 6182.2 | 3023.7 | 2969.9 | 3291.1 | 1.03  | 4.99E-44 | 2.41E-42 | hypothetical protein MAA_09397                                      |
| 19258791 | MAA_04505 | 383.4  | 409.8  | 362.2  | 215.1  | 162.1  | 183.3  | 1.04  | 6.66E-19 | 1.23E-17 | negative acting factor-like protein                                 |



|          |           |        |        |         |        |        |        |      |          |          |                                                       |
|----------|-----------|--------|--------|---------|--------|--------|--------|------|----------|----------|-------------------------------------------------------|
| 19256660 | MAA_02374 | 140.5  | 162.2  | 210.4   | 78.8   | 79.6   | 89.8   | 1.05 | 1.88E-12 | 2.18E-11 | U-box domain containing protein                       |
| 19256608 | MAA_02322 | 1553.0 | 979.2  | 1147.9  | 475.0  | 792.1  | 508.1  | 1.05 | 2.18E-03 | 6.54E-03 | copper resistance protein Crd2, partial               |
| 19256472 | MAA_02186 | 86.3   | 94.4   | 107.0   | 42.7   | 46.3   | 49.4   | 1.06 | 9.56E-18 | 1.63E-16 | acetyl-hydrolase                                      |
| 19256621 | MAA_02335 | 154.1  | 121.1  | 132.8   | 61.7   | 63.6   | 70.8   | 1.06 | 6.27E-17 | 1.04E-15 | glycoside hydrolase family 1 protein                  |
| 19264907 | MAA_10621 | 111.9  | 108.1  | 110.8   | 51.1   | 53.0   | 52.0   | 1.08 | 4.67E-26 | 1.20E-24 | MYB DNA-binding domain-containing protein             |
| 19259257 | MAA_04971 | 61.1   | 64.3   | 61.0    | 33.7   | 27.4   | 26.8   | 1.08 | 4.59E-05 | 1.92E-04 | hypothetical protein MAA_04971                        |
| 19258828 | MAA_04542 | 2395.3 | 2199.8 | 2305.5  | 1151.5 | 1036.6 | 1065.5 | 1.08 | 1.62E-45 | 8.63E-44 | Peptidase S10, serine carboxypeptidase                |
| 19259248 | MAA_04962 | 141.1  | 137.5  | 170.2   | 68.2   | 70.3   | 72.2   | 1.09 | 4.24E-20 | 8.26E-19 | aldehyde dehydrogenase                                |
| 19256328 | MAA_02042 | 511.6  | 558.8  | 1021.8  | 397.5  | 306.7  | 277.3  | 1.09 | 4.61E-03 | 1.27E-02 | 3-oxo-5-alpha-steroid 4-dehydrogenase                 |
| 19256298 | MAA_02012 | 88.8   | 94.8   | 95.8    | 45.5   | 36.2   | 49.2   | 1.09 | 1.37E-13 | 1.73E-12 | Arv1-like family protein                              |
| 19259155 | MAA_04869 | 7.1    | 6.0    | 9.2     | 2.6    | 2.0    | 5.7    | 1.10 | 1.76E-02 | 4.02E-02 | Glycoside hydrolase, clan GH-D                        |
| 19263120 | MAA_08834 | 81.6   | 62.4   | 70.4    | 33.9   | 33.1   | 32.4   | 1.11 | 1.27E-20 | 2.57E-19 | multidrug resistance-associated protein 1             |
| 19262580 | MAA_08294 | 71.2   | 60.3   | 68.3    | 26.6   | 35.0   | 31.0   | 1.11 | 2.12E-11 | 2.18E-10 | Aminoglycoside phosphotransferase                     |
| 19264965 | MAA_10681 | 30.0   | 31.5   | 26.2    | 8.7    | 17.8   | 14.1   | 1.11 | 7.30E-05 | 2.93E-04 | hypothetical protein MAA_10681                        |
| 19255988 | MAA_01702 | 725.6  | 739.0  | 673.9   | 353.9  | 317.2  | 312.7  | 1.12 | 6.37E-36 | 2.53E-34 | Chloramphenicol acetyltransferase-like domain protein |
| 19259172 | MAA_04886 | 265.2  | 247.2  | 290.8   | 129.2  | 113.5  | 124.7  | 1.13 | 1.03E-25 | 2.60E-24 | hypothetical protein MAA_04886                        |
| 19261979 | MAA_07693 | 17.8   | 14.5   | 14.1    | 8.1    | 7.6    | 5.4    | 1.13 | 3.57E-05 | 1.52E-04 | beta-xylosidase                                       |
| 19261902 | MAA_07616 | 204.9  | 221.9  | 188.1   | 88.3   | 93.9   | 97.4   | 1.14 | 3.75E-28 | 1.09E-26 | Low temperature requirement A                         |
| 19264908 | MAA_10622 | 1660.4 | 1849.3 | 1733.7  | 825.3  | 778.5  | 780.8  | 1.14 | 4.00E-46 | 2.25E-44 | hypothetical protein MAA_10622                        |
| 19259304 | MAA_05018 | 63.4   | 79.2   | 73.5    | 23.9   | 32.8   | 40.2   | 1.16 | 2.41E-07 | 1.47E-06 | hypothetical protein MAA_05018                        |
| 19263632 | MAA_09346 | 135.5  | 117.8  | 183.0   | 60.3   | 66.4   | 66.6   | 1.17 | 1.14E-11 | 1.19E-10 | polysaccharide deacetylase                            |
| 19256174 | MAA_01888 | 489.8  | 480.1  | 513.7   | 206.0  | 221.7  | 222.7  | 1.19 | 4.27E-48 | 2.55E-46 | choline oxidase                                       |
| 19256043 | MAA_01757 | 354.0  | 354.3  | 364.0   | 150.4  | 156.0  | 160.4  | 1.20 | 3.61E-44 | 1.78E-42 | hypothetical protein MAA_01757                        |
| 19256518 | MAA_02232 | 127.2  | 124.4  | 148.1   | 61.5   | 50.4   | 61.0   | 1.21 | 3.48E-25 | 8.69E-24 | hypothetical protein MAA_02232                        |
| 19259107 | MAA_04821 | 7472.8 | 8504.6 | 10125.9 | 4071.9 | 3562.5 | 3530.3 | 1.23 | 1.41E-24 | 3.35E-23 | hypothetical protein MAA_04821                        |
| 19264900 | MAA_10614 | 16.3   | 18.7   | 16.2    | 8.4    | 6.8    | 6.4    | 1.25 | 1.69E-07 | 1.05E-06 | impB/mucB/samB family protein                         |
| 19261903 | MAA_07617 | 1524.7 | 1672.0 | 1585.4  | 686.4  | 659.7  | 660.9  | 1.25 | 3.51E-56 | 2.63E-54 | hypothetical protein MAA_07617                        |
| 19255993 | MAA_01707 | 12.6   | 14.8   | 15.6    | 5.5    | 6.4    | 6.1    | 1.25 | 7.57E-10 | 6.09E-09 | hypothetical protein MAA_01707                        |
| 19259247 | MAA_04961 | 118.4  | 105.1  | 74.9    | 43.8   | 46.0   | 34.6   | 1.26 | 7.41E-11 | 6.98E-10 | vacuolar triacylglycerol lipase                       |
| 19255955 | MAA_01669 | 21.8   | 17.1   | 18.2    | 5.9    | 7.0    | 10.8   | 1.27 | 4.29E-05 | 1.80E-04 | Protein kinase-like protein                           |
| 19259086 | MAA_04800 | 911.8  | 958.0  | 1159.7  | 506.0  | 378.8  | 366.3  | 1.28 | 7.85E-20 | 1.49E-18 | Glucose receptor Git3                                 |
| 19264961 | MAA_10677 | 90.5   | 92.2   | 101.6   | 38.5   | 37.4   | 41.5   | 1.28 | 3.70E-32 | 1.27E-30 | hypothetical protein MAA_10677                        |
| 19256001 | MAA_01715 | 239.6  | 262.4  | 335.4   | 131.7  | 109.7  | 102.1  | 1.29 | 2.63E-17 | 4.44E-16 | DOMON domain protein                                  |

|          |           |         |         |         |        |        |        |      |           |           |                                                                             |
|----------|-----------|---------|---------|---------|--------|--------|--------|------|-----------|-----------|-----------------------------------------------------------------------------|
| 19264983 | MAA_10699 | 55.6    | 59.9    | 61.7    | 27.4   | 22.0   | 22.0   | 1.31 | 4.56E-11  | 4.50E-10  | methyltransferase                                                           |
| 19264970 | MAA_10686 | 10118.0 | 10153.0 | 11221.5 | 4003.6 | 4485.7 | 4063.7 | 1.33 | 3.60E-49  | 2.28E-47  | WD repeat containing protein 44                                             |
| 19259066 | MAA_04780 | 5.5     | 7.1     | 11.5    | 2.2    | 5.5    | 1.8    | 1.33 | 1.36E-02  | 3.24E-02  | hypothetical protein MAA_04780                                              |
| 19258947 | MAA_04661 | 291.4   | 274.0   | 304.6   | 117.7  | 114.6  | 112.2  | 1.34 | 1.98E-55  | 1.39E-53  | Ubiquitin system component Cue                                              |
| 19263096 | MAA_08810 | 33.2    | 37.9    | 42.7    | 14.0   | 15.0   | 15.6   | 1.35 | 1.08E-26  | 2.84E-25  | ATPase-like, ATP-binding domain protein                                     |
| 19255953 | MAA_01667 | 47.7    | 50.5    | 73.3    | 21.2   | 22.5   | 22.7   | 1.37 | 1.28E-14  | 1.78E-13  | Transcription factor, fungi                                                 |
| 19255986 | MAA_01700 | 552.4   | 615.4   | 558.0   | 233.2  | 234.8  | 193.9  | 1.38 | 8.81E-37  | 3.57E-35  | protein-arginine deiminase type-4                                           |
| 19258907 | MAA_04621 | 3028.1  | 3071.0  | 3837.9  | 1289.7 | 1381.8 | 1133.6 | 1.38 | 6.50E-30  | 2.06E-28  | hypothetical protein MAA_04621                                              |
| 19258894 | MAA_04608 | 278.6   | 236.9   | 292.9   | 101.2  | 102.8  | 100.9  | 1.41 | 2.70E-44  | 1.40E-42  | proteinrelated to alpha-glucosidase b                                       |
| 19255992 | MAA_01706 | 3.3     | 2.6     | 1.9     | 0.7    | 1.0    | 1.2    | 1.41 | 1.78E-02  | 4.06E-02  | hypothetical protein MAA_01706                                              |
| 19258898 | MAA_04612 | 22.5    | 21.9    | 28.3    | 7.4    | 9.6    | 9.6    | 1.45 | 4.23E-12  | 4.64E-11  | Mg <sup>2+</sup> transporter protein, CorA-like/Zinc transport protein ZntB |
| 19259256 | MAA_04970 | 44.7    | 60.8    | 39.2    | 17.5   | 20.4   | 14.6   | 1.46 | 1.73E-06  | 9.25E-06  | hypothetical protein MAA_04970                                              |
| 19261978 | MAA_07692 | 17.6    | 18.0    | 33.7    | 10.9   | 4.0    | 10.2   | 1.46 | 2.56E-04  | 9.12E-04  | carbohydrate-binding protein, partial                                       |
| 19264882 | MAA_10596 | 349.6   | 360.4   | 320.5   | 129.7  | 119.0  | 123.4  | 1.47 | 3.12E-63  | 2.87E-61  | hypothetical protein MAA_10596                                              |
| 19259266 | MAA_04980 | 451.4   | 518.9   | 722.6   | 175.2  | 185.8  | 239.8  | 1.49 | 2.06E-18  | 3.65E-17  | extracellular dioxygenase                                                   |
| 19255913 | MAA_01627 | 20.0    | 30.1    | 22.0    | 9.8    | 9.8    | 5.6    | 1.52 | 6.40E-06  | 3.10E-05  | L-xylulose reductase                                                        |
| 19263628 | MAA_09342 | 19.0    | 16.5    | 26.5    | 1.5    | 5.5    | 14.7   | 1.52 | 1.46E-02  | 3.44E-02  | carbohydrate-binding module family 13 protein                               |
| 19264885 | MAA_10599 | 3434.9  | 3322.6  | 3437.2  | 1348.0 | 1116.6 | 1019.5 | 1.55 | 1.15E-45  | 6.31E-44  | leucine rich repeat domain containing protein                               |
| 19261998 | MAA_07712 | 406.0   | 380.6   | 491.7   | 141.9  | 145.6  | 145.9  | 1.56 | 2.37E-37  | 1.00E-35  | hypothetical protein MAA_07712                                              |
| 19256314 | MAA_02028 | 5.6     | 7.4     | 7.2     | 3.9    | 1.3    | 1.6    | 1.57 | 2.03E-03  | 6.13E-03  | cyclopropane-fatty-acyl-phospholipid synthase                               |
| 19258829 | MAA_04543 | 820.3   | 904.0   | 736.5   | 253.6  | 296.6  | 273.5  | 1.58 | 4.74E-41  | 2.13E-39  | Phospholipase A2                                                            |
| 19255989 | MAA_01703 | 261.3   | 247.0   | 257.5   | 99.1   | 73.3   | 79.5   | 1.60 | 6.87E-38  | 2.96E-36  | zinc finger domain-containing protein                                       |
| 19262903 | MAA_08617 | 63.5    | 51.0    | 70.2    | 27.8   | 16.7   | 14.9   | 1.64 | 4.81E-12  | 5.20E-11  | aromatic amino acid aminotransferase                                        |
| 19256453 | MAA_02167 | 123.2   | 142.4   | 186.7   | 46.9   | 48.3   | 49.2   | 1.65 | 5.03E-24  | 1.18E-22  | Glucoamylase, putative                                                      |
| 19255987 | MAA_01701 | 385.0   | 346.6   | 354.7   | 133.5  | 120.9  | 90.7   | 1.65 | 5.43E-34  | 2.00E-32  | polyketide synthase                                                         |
| 19256223 | MAA_01937 | 34.8    | 45.0    | 37.4    | 9.8    | 11.8   | 14.0   | 1.72 | 9.24E-17  | 1.50E-15  | O-methyltransferase, family 2                                               |
| 19263645 | MAA_09359 | 11.1    | 9.3     | 8.3     | 3.3    | 1.8    | 3.4    | 1.76 | 3.84E-12  | 4.25E-11  | Pfs, NACHT and WD domain protein                                            |
| 19256461 | MAA_02175 | 580.1   | 510.7   | 635.5   | 184.6  | 152.6  | 167.3  | 1.77 | 3.61E-63  | 3.17E-61  | immunoglobulin I-set domain-containing protein                              |
| 19256537 | MAA_02251 | 1336.1  | 1347.9  | 1841.9  | 482.4  | 364.5  | 334.9  | 1.94 | 4.58E-35  | 1.75E-33  | chromosomal organization and DNA repair protein Mms21                       |
| 19261904 | MAA_07618 | 1851.2  | 1923.4  | 2135.9  | 518.8  | 524.5  | 481.3  | 1.95 | 2.73E-104 | 5.52E-102 | cytochrome P450                                                             |
| 19256694 | MAA_02408 | 2259.2  | 1895.8  | 2119.2  | 615.0  | 519.8  | 462.2  | 1.97 | 4.27E-62  | 3.46E-60  | Peptidase S8/S53, subtilisin/kexin/sedolisin                                |
| 19262576 | MAA_08290 | 50.4    | 69.1    | 53.1    | 9.2    | 19.1   | 15.2   | 1.99 | 4.59E-12  | 5.00E-11  | hypothetical protein MAA_08290                                              |
| 19255932 | MAA_01646 | 24.4    | 18.3    | 21.7    | 4.8    | 4.0    | 7.4    | 1.99 | 1.13E-13  | 1.45E-12  | Tyrosine-protein kinase, active site protein                                |

|          |           |         |         |         |        |        |        |       |           |           |                                                                     |
|----------|-----------|---------|---------|---------|--------|--------|--------|-------|-----------|-----------|---------------------------------------------------------------------|
| 19264977 | MAA_10693 | 39.0    | 55.4    | 45.6    | 11.8   | 11.7   | 10.9   | 2.02  | 3.61E-18  | 6.25E-17  | hypothetical protein MAA_10693                                      |
| 19263644 | MAA_09358 | 1476.0  | 990.9   | 850.5   | 302.8  | 245.0  | 252.1  | 2.05  | 1.76E-31  | 5.84E-30  | hypothetical protein MAA_09358                                      |
| 19262909 | MAA_08623 | 524.2   | 474.5   | 668.6   | 165.8  | 106.4  | 127.7  | 2.06  | 3.93E-35  | 1.53E-33  | phytanoyl-CoA dioxygenase                                           |
| 19264909 | MAA_10623 | 1925.3  | 2056.7  | 2255.7  | 515.6  | 464.6  | 477.4  | 2.10  | 1.26E-124 | 3.65E-122 | DNA-binding WRKY domain-containing protein                          |
| 19263139 | MAA_08853 | 4.1     | 3.3     | 7.7     | 0.9    | 1.3    | 1.0    | 2.25  | 7.69E-06  | 3.65E-05  | Cytochrome P450 CYP540B20                                           |
| 19262907 | MAA_08621 | 31.2    | 23.1    | 31.1    | 6.1    | 3.9    | 6.9    | 2.34  | 9.04E-16  | 1.36E-14  | f420-dependent NADP reductase                                       |
| 19263162 | MAA_08876 | 275.5   | 284.6   | 402.3   | 69.7   | 66.2   | 53.8   | 2.34  | 3.03E-44  | 1.53E-42  | DNA double-strand break repair and VJ recombination XRCC4           |
| 19258948 | MAA_04662 | 515.5   | 402.8   | 550.8   | 95.4   | 93.5   | 99.8   | 2.35  | 5.51E-90  | 8.59E-88  | zinc finger domain-containing protein                               |
| 19256607 | MAA_02321 | 280.8   | 288.0   | 246.7   | 49.5   | 56.3   | 47.5   | 2.41  | 2.54E-91  | 4.68E-89  | Major facilitator superfamily domain, general substrate transporter |
| 19256536 | MAA_02250 | 12775.9 | 13306.8 | 22026.9 | 3462.8 | 2773.7 | 2657.6 | 2.44  | 3.84E-16  | 5.93E-15  | PAS domain containing protein                                       |
| 19262906 | MAA_08620 | 229.3   | 196.3   | 230.3   | 48.0   | 34.1   | 38.1   | 2.45  | 3.38E-64  | 3.43E-62  | nmrA-like family protein                                            |
| 19255948 | MAA_01662 | 77.5    | 64.2    | 68.4    | 11.4   | 9.0    | 16.1   | 2.53  | 4.95E-23  | 1.14E-21  | GCN5-related N-acetyltransferase (GNAT) domain protein              |
| 19264901 | MAA_10615 | 77.2    | 51.6    | 124.0   | 10.3   | 15.3   | 17.3   | 2.56  | 2.41E-10  | 2.09E-09  | ScfA                                                                |
| 19255934 | MAA_01648 | 0.6     | 1.4     | 3.6     | 0.4    | 0.0    | 0.6    | 2.58  | 1.78E-02  | 4.06E-02  | Metallopeptidase, catalytic domain protein                          |
| 19259265 | MAA_04979 | 864.5   | 876.4   | 1289.4  | 178.2  | 160.5  | 163.8  | 2.59  | 1.81E-72  | 2.16E-70  | chloride channel protein                                            |
| 19262575 | MAA_08289 | 46.5    | 55.0    | 20.3    | 5.1    | 4.2    | 10.6   | 2.62  | 6.93E-11  | 6.56E-10  | cell surface protein (Mas1)                                         |
| 19263643 | MAA_09357 | 420.9   | 300.0   | 319.5   | 73.1   | 47.3   | 48.8   | 2.62  | 1.23E-51  | 8.01E-50  | hypothetical protein X797_010135                                    |
| 19262908 | MAA_08622 | 5.4     | 4.0     | 6.6     | 1.3    | 0.4    | 0.9    | 2.65  | 4.67E-13  | 5.73E-12  | polyketide synthase                                                 |
| 19259065 | MAA_04779 | 5.4     | 6.0     | 5.5     | 0.8    | 1.0    | 0.8    | 2.70  | 4.28E-14  | 5.66E-13  | hypothetical protein MAA_04779                                      |
| 19258936 | MAA_04650 | 811.0   | 899.3   | 667.2   | 133.9  | 114.6  | 95.8   | 2.79  | 5.60E-77  | 7.08E-75  | hypothetical protein MAA_04650                                      |
| 19263642 | MAA_09356 | 3571.1  | 2497.3  | 2417.6  | 549.2  | 325.8  | 338.3  | 2.81  | 1.96E-18  | 3.52E-17  | hemeolysin E                                                        |
| 19255954 | MAA_01668 | 129.4   | 136.6   | 259.5   | 25.4   | 22.2   | 21.8   | 2.92  | 2.68E-16  | 4.18E-15  | Phosphoesterase                                                     |
| 19262891 | MAA_08605 | 15.7    | 12.7    | 12.3    | 1.0    | 3.5    | 0.2    | 3.11  | 5.97E-07  | 3.41E-06  | hypothetical protein MAA_08605                                      |
| 19256297 | MAA_02011 | 5.8     | 11.4    | 28.4    | 2.1    | 2.2    | 0.9    | 3.14  | 5.95E-06  | 2.93E-05  | hypothetical protein MAA_02011                                      |
| 19255945 | MAA_01659 | 8.3     | 11.5    | 7.4     | 0.9    | 0.6    | 1.5    | 3.21  | 2.25E-14  | 3.06E-13  | hypothetical protein MAA_01659                                      |
| 19262030 | MAA_07744 | 20.0    | 20.5    | 20.8    | 1.7    | 1.0    | 2.8    | 3.47  | 1.54E-28  | 4.60E-27  | glucose-methanol-choline oxidoreductase                             |
| 19264911 | MAA_10625 | 2.6     | 5.7     | 6.1     | 0.0    | 0.0    | 0.8    | 4.15  | 5.16E-03  | 1.38E-02  | Major facilitator superfamily domain, general substrate transporter |
| 19264950 | MAA_10666 | 2.4     | 1.7     | 1.5     | 0.0    | 0.0    | 0.0    | 7.48  | 1.60E-02  | 3.72E-02  | hypothetical protein MAA_10666                                      |
| 19263641 | MAA_09355 | 0.2     | 1.0     | 0.9     | 0.0    | 0.0    | 0.0    | 12.77 | 1.63E-02  | 3.78E-02  | cyanamide hydratase                                                 |

**Table S4.** A list of genes co-dysregulated in the *ΔbrlA* and *ΔabaA-1* mutants versus the WT strain of *M. roberstii*.

| Gene_id   | log <sub>2</sub> Ratio* |                  | Description                                                 |
|-----------|-------------------------|------------------|-------------------------------------------------------------|
|           | <i>ΔbrlA</i> /WT        | <i>ΔabaA</i> /WT |                                                             |
| MAA_09352 | -17.89                  | -5.08            | hypothetical protein MAA_09352                              |
| MAA_09349 | -16.54                  | -3.37            | hypothetical protein X797_010127                            |
| MAA_08611 | -15.53                  | -15.53           | hypothetical protein X797_008967                            |
| MAA_01624 | -14.04                  | -4.96            | LysR family regulatory protein                              |
| MAA_01625 | -13.34                  | -13.34           | Thioesterase                                                |
| MAA_08308 | -9.84                   | -9.18            | Peptidase aspartic, active site protein                     |
| MAA_09351 | -9.23                   | -10.73           | hypothetical protein MAA_09351                              |
| MAA_08339 | -9.06                   | -11.15           | hypothetical protein MAA_08339                              |
| MAA_04865 | -7.91                   | -8.85            | Peptidoglycan-binding lysin domain protein                  |
| MAA_08347 | -7.30                   | -4.10            | phytanoyl-CoA dioxygenase                                   |
| MAA_01653 | -7.10                   | -1.74            | hypothetical protein MAA_01653                              |
| MAA_08370 | -6.64                   | -2.82            | polyketide synthase                                         |
| MAA_04645 | -6.20                   | -5.14            | GPR1/FUN34/yaaH family protein                              |
| MAA_10665 | -5.98                   | -5.16            | hypothetical protein X797_001079                            |
| MAA_04450 | -5.54                   | -5.37            | Glycoside hydrolase, superfamily                            |
| MAA_09350 | -5.52                   | -2.83            | hypothetical protein MAA_09350                              |
| MAA_10602 | -5.14                   | -5.55            | subtilisin-like protease                                    |
| MAA_08610 | -5.05                   | -1.34            | Protein kinase domain containing protein                    |
| MAA_08341 | -4.86                   | -3.84            | hypothetical protein MAA_08341                              |
| MAA_02359 | -4.56                   | -3.25            | Carbohydrate-binding WSC                                    |
| MAA_10600 | -4.50                   | -6.30            | proteinrelated to zinc finger protein odd-paired-like (opl) |
| MAA_02183 | -4.42                   | -1.11            | Glucose-repressible protein Grg1                            |
| MAA_05017 | -4.39                   | -1.45            | Extracellular membrane protein, CFEM domain protein         |
| MAA_08289 | -4.05                   | 2.62             | cell surface protein (Mas1)                                 |
| MAA_01642 | -3.63                   | -2.68            | fatty acid synthase subunit alpha reductase                 |
| MAA_01639 | -3.63                   | -2.31            | peptide synthetase                                          |
| MAA_02376 | -3.57                   | -3.09            | Aromatic-ring hydroxylase-like protein                      |
| MAA_07718 | -3.45                   | -3.04            | hypothetical protein MAA_07718                              |
| MAA_08286 | -3.37                   | -2.11            | dehydrogenase/reductase SDR family                          |
| MAA_07742 | -3.30                   | -5.36            | subtilisin-like protease                                    |
| MAA_08613 | -3.30                   | -3.53            | ntf2-like domain protein                                    |
| MAA_01883 | -3.29                   | -2.47            | ABC-2 type transporter                                      |
| MAA_05026 | -3.22                   | -3.13            | galactosyltransferase superfamily protein                   |
| MAA_01901 | -3.20                   | -2.83            | DUF967 domain protein                                       |
| MAA_04690 | -3.10                   | -2.57            | DUF1479 domain protein                                      |
| MAA_01637 | -3.07                   | -3.20            | hypothetical protein MAA_01637                              |
| MAA_08290 | -3.02                   | 1.99             | hypothetical protein MAA_08290                              |
| MAA_10702 | -2.88                   | -2.66            | D-xylulose reductase A                                      |
| MAA_10599 | -2.85                   | 1.55             | leucine rich repeat domain containing protein               |
| MAA_01638 | -2.84                   | -1.57            | canalicular multispecific organic anion transporter 1       |
| MAA_10641 | -2.71                   | -1.79            | carbohydrate esterase family 1 protein                      |
| MAA_10709 | -2.63                   | -2.68            | nicotinamide N-methyltransferase                            |
| MAA_02039 | -2.59                   | -2.58            | Glutathione S-transferase/chloride channel                  |
| MAA_07741 | -2.53                   | -3.83            | Formate/nitrite transporter                                 |
| MAA_02452 | -2.37                   | -3.33            | alcohol dehydrogenase                                       |
| MAA_01629 | -2.20                   | -1.30            | GCN5-related N-acetyltransferase (GNAT) domain protein      |
| MAA_09390 | -2.19                   | -2.46            | putative protein family Cys-rich                            |
| MAA_04981 | -2.16                   | -1.40            | Extracellular membrane protein, 8-cysteine region, CFEM     |
| MAA_04909 | -2.15                   | -1.17            | major facilitator superfamily transporter                   |
| MAA_01641 | -2.14                   | -1.32            | ankyrin repeat protein                                      |
| MAA_02090 | -2.12                   | -1.51            | GCN5-related N-acetyltransferase (GNAT) domain protein      |
| MAA_08805 | -2.12                   | -2.90            | IDI-2 precursor                                             |
| MAA_02027 | -2.07                   | -1.69            | hypothetical protein MAA_02027                              |

|           |       |       |                                                                     |
|-----------|-------|-------|---------------------------------------------------------------------|
| MAA_04499 | -2.05 | -1.48 | pyruvate decarboxylase                                              |
| MAA_02413 | -2.03 | -2.53 | C4-dicarboxylate transporter/malic acid transporter                 |
| MAA_02453 | -2.03 | -1.88 | arrestin domain-containing protein                                  |
| MAA_08327 | -2.01 | -1.66 | hypothetical protein MAA_08327                                      |
| MAA_04843 | -1.97 | -2.73 | Basic-leucine zipper (bZIP) transcription factor                    |
| MAA_05008 | -1.97 | -1.04 | taurine catabolism dioxygenase TauD                                 |
| MAA_04650 | -1.96 | 2.79  | hypothetical protein MAA_04650                                      |
| MAA_08570 | -1.85 | -1.20 | glyoxalase family protein                                           |
| MAA_04982 | -1.82 | -2.01 | protein-arginine deiminase type-4                                   |
| MAA_04710 | -1.75 | -1.14 | Glutathione S-transferase/chloride channel                          |
| MAA_04917 | -1.75 | -1.15 | Stress responsive alpha-beta barrel                                 |
| MAA_04866 | -1.73 | -1.12 | SAM-dependent methyltransferase                                     |
| MAA_07644 | -1.73 | -1.10 | hypothetical protein MAA_07644                                      |
| MAA_02032 | -1.69 | -1.42 | 3-phytase                                                           |
| MAA_04537 | -1.68 | -2.56 | Major facilitator superfamily domain protein                        |
| MAA_08621 | -1.62 | 2.34  | f420-dependent NADP reductase                                       |
| MAA_02480 | -1.60 | -2.12 | NAD-specific glutamate dehydrogenase                                |
| MAA_04750 | -1.58 | -1.83 |                                                                     |
| MAA_08623 | -1.53 | 2.06  | phytanoyl-CoA dioxygenase                                           |
| MAA_10691 | -1.53 | -1.23 | S-adenosyl-L-methionine-dependent methyltransferase                 |
| MAA_07740 | -1.48 | -1.10 | muconate cycloisomerase I, MLE                                      |
| MAA_01997 | -1.46 | -1.30 | Carboxylesterase type B, active site protein                        |
| MAA_02377 | -1.45 | -1.62 | ATP-binding cassette transporter ift1                               |
| MAA_04961 | -1.45 | 1.26  | vacuolar triacylglycerol lipase                                     |
| MAA_09347 | -1.40 | -1.28 | transmembrane amino acid transporter                                |
| MAA_10670 | -1.35 | 1.00  | hypothetical protein MAA_10670                                      |
| MAA_10681 | -1.34 | 1.11  | hypothetical protein MAA_10681                                      |
| MAA_10682 | -1.34 | -1.27 | WD40 domain protein                                                 |
| MAA_01953 | -1.32 | -1.05 | dipeptidyl aminopeptidase/acylaminoacyl peptidase                   |
| MAA_09396 | -1.30 | -1.06 | Alcohol dehydrogenase superfamily, zinc-type                        |
| MAA_01935 | -1.29 | -1.19 | integral membrane protein                                           |
| MAA_04788 | -1.28 | -1.31 | dopa 4,5-dioxygenase                                                |
| MAA_08806 | -1.27 | -3.44 | Aminoglycoside phosphotransferase                                   |
| MAA_09381 | -1.27 | -1.55 | protoporphyrinogen oxidase                                          |
| MAA_01702 | -1.19 | 1.12  | Chloramphenicol acetyltransferase-like domain protein               |
| MAA_04685 | -1.06 | -1.13 | hypothetical protein MAA_04685                                      |
| MAA_02232 | 1.05  | 1.21  | hypothetical protein MAA_02232                                      |
| MAA_10686 | 1.09  | 1.33  | WD repeat containing protein 44                                     |
| MAA_04608 | 1.10  | 1.41  | proteinrelated to alpha-glucosidase b                               |
| MAA_04821 | 1.13  | 1.23  | hypothetical protein MAA_04821                                      |
| MAA_08306 | 1.13  | -2.03 | Ankyrin repeat protein                                              |
| MAA_07744 | 1.23  | 3.47  | glucose-methanol-choline oxidoreductase                             |
| MAA_02251 | 1.34  | 1.94  | chromosomal organization and DNA repair protein Mms21               |
| MAA_08834 | 1.36  | 1.11  | multidrug resistance-associated protein 1                           |
| MAA_01715 | 1.61  | 1.29  | DOMON domain protein                                                |
| MAA_08605 | 2.08  | 3.11  | hypothetical protein MAA_08605                                      |
| MAA_02250 | 2.28  | 2.44  | PAS domain containing protein                                       |
| MAA_02042 | 2.29  | 1.09  | 3-oxo-5-alpha-steroid 4-dehydrogenase                               |
| MAA_02321 | 2.34  | 2.41  | Major facilitator superfamily domain, general substrate transporter |
| MAA_09359 | 2.54  | 1.76  | Pfs, NACHT and WD domain protein                                    |
| MAA_04780 | 2.60  | 1.33  | hypothetical protein MAA_04780                                      |
| MAA_04779 | 3.37  | 2.70  | hypothetical protein MAA_04779                                      |
| MAA_09358 | 3.45  | 2.05  | hypothetical protein MAA_09358                                      |
| MAA_09357 | 4.20  | 2.62  | hypothetical protein X797_010135                                    |
| MAA_09356 | 4.21  | 2.81  | hemeolysin E                                                        |

\* Table entries marked in red denote those genes codysregulated at opposite directions.

**Table S5.** Counts of DEGs enriched to GO terms of three categories in the *ΔbrlA* mutant of *M. robertsii*.

| GO_ID      | GO_Term                                                                                               | GO_Category        | p-value  | Count of DEGs |      |
|------------|-------------------------------------------------------------------------------------------------------|--------------------|----------|---------------|------|
|            |                                                                                                       |                    |          | Up            | Down |
| GO:0008150 | biological_process                                                                                    | Biological Process | 4.62E-02 | 16            | 52   |
| GO:0055114 | obsolete oxidation-reduction process                                                                  | Biological Process | 1.49E-02 | 4             | 10   |
| GO:0035690 | cellular response to xenobiotic stimulus                                                              | Biological Process | 3.32E-02 | 0             | 5    |
| GO:1900557 | emericellamide biosynthetic process                                                                   | Biological Process | 1.16E-02 | 0             | 3    |
| GO:1900560 | austinol biosynthetic process                                                                         | Biological Process | 1.16E-02 | 1             | 2    |
| GO:1900563 | dehydroaustinol biosynthetic process                                                                  | Biological Process | 1.16E-02 | 1             | 2    |
| GO:0030163 | protein catabolic process                                                                             | Biological Process | 3.45E-02 | 0             | 2    |
| GO:0033194 | response to hydroperoxide                                                                             | Biological Process | 1.24E-02 | 1             | 1    |
| GO:0052699 | ergothioneine biosynthetic process                                                                    | Biological Process | 1.24E-02 | 1             | 1    |
| GO:0052707 | N-alpha,N-alpha,N-alpha-trimethyl-L-histidine biosynthesis from histidine                             | Biological Process | 1.24E-02 | 1             | 1    |
| GO:1903253 | hercynylcysteine sulfoxide biosynthetic process                                                       | Biological Process | 1.24E-02 | 1             | 1    |
| GO:1903255 | hercynylselenocysteine biosynthetic process                                                           | Biological Process | 1.24E-02 | 1             | 1    |
| GO:1903257 | selenoneine biosynthetic process                                                                      | Biological Process | 1.24E-02 | 1             | 1    |
| GO:0006808 | regulation of nitrogen utilization                                                                    | Biological Process | 1.24E-02 | 1             | 1    |
| GO:1902181 | verruculogen biosynthetic process                                                                     | Biological Process | 3.45E-02 | 1             | 1    |
| GO:0005575 | cellular_component                                                                                    | Cellular Component | 1.45E-05 | 23            | 94   |
| GO:0016021 | integral component of membrane                                                                        | Cellular Component | 2.85E-03 | 3             | 11   |
| GO:0005886 | plasma membrane                                                                                       | Cellular Component | 2.45E-02 | 0             | 7    |
| GO:0003674 | molecular_function                                                                                    | Molecular Function | 4.41E-03 | 17            | 57   |
| GO:0000166 | nucleotide binding                                                                                    | Molecular Function | 5.48E-03 | 2             | 4    |
| GO:0016887 | ATP hydrolysis activity                                                                               | Molecular Function | 4.79E-02 | 0             | 4    |
| GO:0008559 | ABC-type xenobiotic transporter activity                                                              | Molecular Function | 1.37E-03 | 0             | 3    |
| GO:0017111 | nucleoside-triphosphatase activity                                                                    | Molecular Function | 1.89E-03 | 1             | 3    |
| GO:0005506 | iron ion binding                                                                                      | Molecular Function | 4.19E-02 | 2             | 3    |
| GO:0052716 | hydroquinone:oxygen oxidoreductase activity                                                           | Molecular Function | 1.24E-02 | 0             | 2    |
| GO:0015179 | L-amino acid transmembrane transporter activity                                                       | Molecular Function | 1.24E-02 | 0             | 2    |
| GO:0015297 | antiporter activity                                                                                   | Molecular Function | 1.24E-02 | 0             | 2    |
| GO:0016757 | glycosyltransferase activity                                                                          | Molecular Function | 1.24E-02 | 0             | 2    |
| GO:0052689 | carboxylic ester hydrolase activity                                                                   | Molecular Function | 3.41E-02 | 1             | 2    |
| GO:0016705 | oxidoreductase activity, acting on paired donors, with incorporation or reduction of molecular oxygen | Molecular Function | 3.62E-02 | 2             | 2    |
| GO:0044876 | hercynylselenocysteine synthase                                                                       | Molecular Function | 1.24E-02 | 1             | 1    |
| GO:0052706 | histidine N-methyltransferase activity                                                                | Molecular Function | 1.24E-02 | 1             | 1    |
| GO:0061686 | hercynylcysteine sulfoxide synthase activity                                                          | Molecular Function | 1.24E-02 | 1             | 1    |
| GO:0016614 | oxidoreductase activity, acting on CH-OH group of donors                                              | Molecular Function | 3.45E-02 | 1             | 1    |

**Table S6.** Counts of DEGs enriched to GO terms of three categories in the *ΔabaA-1* mutant of *M. robertsii*.

| GO_ID      | GO_Term                                                                    | GO_Category        | p-value  | Count of DEGs |      |
|------------|----------------------------------------------------------------------------|--------------------|----------|---------------|------|
|            |                                                                            |                    |          | Up            | Down |
| GO:1900557 | emericellamide biosynthetic process                                        | Biological Process | 5.99E-03 | 2             | 1    |
| GO:0009405 | obsolete pathogenesis                                                      | Biological Process | 9.94E-03 | 3             | 3    |
| GO:0031410 | cytoplasmic vesicle                                                        | Cellular Component | 7.82E-03 | 1             | 1    |
| GO:0005575 | cellular_component                                                         | Cellular Component | 1.09E-02 | 39            | 46   |
| GO:0016021 | integral component of membrane                                             | Cellular Component | 2.50E-02 | 3             | 7    |
| GO:0003674 | molecular_function                                                         | Molecular Function | 1.21E-03 | 23            | 40   |
| GO:0016747 | acyltransferase activity, transferring groups other than amino-acyl groups | Molecular Function | 8.18E-03 | 2             | 2    |
| GO:0052689 | carboxylic ester hydrolase activity                                        | Molecular Function | 1.83E-02 | 2             | 1    |
| GO:0004668 | protein-arginine deiminase activity                                        | Molecular Function | 2.21E-02 | 1             | 1    |
| GO:0004364 | glutathione transferase activity                                           | Molecular Function | 4.16E-02 | 0             | 2    |
